# Supplementary material for: Acid‐Responsive Absorption and Emission of 5‐N‐Arylaminothiazoles: Emission of White Light from a Single Fluorescent Dye and a Lewis Acid
Source: PubMed Central journal article supplement — ChemistryOpen. 2016 Aug 2;5(5):434–8. doi: 10.1002/open.201600059 (PMC5062007; doi:10.1002/open.201600059), 2016-08-02

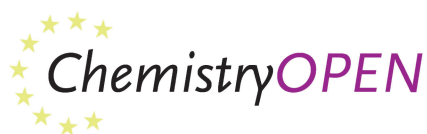

## Supporting Information

© 2016 The Authors. Published by Wiley-VCH Verlag GmbH & Co. KGaA, Weinheim

### **Acid-Responsive Absorption and Emission of 5-*N*-Arylaminothiazoles: Emission of White Light from a Single Fluorescent Dye and a Lewis Acid**

Kirara Yamaguchi,<sup>[a]</sup> Toshiaki Murai,<sup>\*[a]</sup> Jing-Dong Guo,<sup>[b]</sup> Takahiro Sasamori,<sup>[b]</sup> and Norihiro Tokitoh<sup>[b]</sup>

open\_201600059\_sm\_miscellaneous\_information.pdf

## Contents

|                                                                       |     |
|-----------------------------------------------------------------------|-----|
| General Remarks                                                       | S1  |
| Materials                                                             | S1  |
| Instruments                                                           | S1  |
| Synthesis of thioamide                                                | S1  |
| Synthesis of thiazolines and thiazoles                                | S2  |
| Photophysical properties and spectra (the addition of Brønsted acids) | S5  |
| Photophysical properties and spectra (the addition of Lewis acids)    | S8  |
| CIE coordinates                                                       | S12 |
| DFT calculations                                                      | S14 |
| X-ray structure analyses                                              | S15 |
| Crystal data and structure refinement                                 | S15 |
| Planes for the calculations of dihedral angles                        | S17 |
| References                                                            | S18 |
| $^1\text{H}$ and $^{13}\text{C}$ NMR spectra                          | S19 |

## General Remarks.

$^1\text{H}$  and  $^{13}\text{C}$  NMR spectra were recorded in  $\text{CDCl}_3$  or  $\text{CD}_3\text{OH}$ . Chemical shifts of protons are reported in  $\delta$  values referenced to tetramethylsilane as an internal standard in  $\text{CDCl}_3$ , and the following abbreviations are used: s, singlet; d, doublet; t, triplet; m, multiplet. All spectra were acquired in the proton-decoupled mode. HRMS were recorded on a double-focusing mass spectrometer (EI). IR spectra were obtained using KBr pellets or neat films. UV-vis absorption, fluorescence, and absolute fluorescence quantum yields were obtained on the respective spectrometers. Toluene was distilled from sodium metal. All other chemicals were used without further purification. Column chromatography was performed on silica gel 60 N (Spherical Neutral, 100–210  $\mu\text{m}$ ). All manipulations of synthesis were carried out under an argon atmosphere. All measurements were carried out under atmosphere at 23  $^\circ\text{C}$ .

## Materials.

2,6-Diphenylisonicotinic acid, Lawesson's reagent and deuterated solvents were purchased from Aldrich Chemical Company, Inc. Dichloromethane (for synthesis), ethyl acetate, hexane, iodine, methanol, THF and silica gel 60N (Spherical Neutral, 100–210  $\mu\text{m}$ ) were purchased from Kanto Chemical Co., Inc. Acetonitrile, benzylamine, dichloromethane (for measurements), diethyl ether,  $\text{Na}_2\text{S}_2\text{O}_3$ ,  $\text{MgSO}_4$ , toluene and 3  $\text{\AA}$  molecular sieve were purchased from Nakarai Tesque Inc. *n*-BuLi was purchased from Mitsuwa Chemical, Ltd. The compounds **1**, **2**, thioamides and thioformamides were prepared according to literature procedures.<sup>[1]</sup>

## Instruments.

$^1\text{H}$  and  $^{13}\text{C}$  NMR spectra were measured on a JNM- $\alpha$ 400 spectrometer. The mass spectra (MS) and high resolution mass spectra (HRMS) were taken on JMS-700 mass spectrometers. The IR spectra were obtained on a JASCO-FT-IR 410 spectrophotometer. UV-vis spectra were measured on a HITACHI U-4100 spectrophotometer. Fluorescence spectra were measured on a HORIBA FluoroMax-4. Excited and fluorescence spectra were measured on a JASCO spectrofluorometer FP-8600. Fluorescent quantum yields were measured on a HAMAMATSU absolute PL quantum yield spectrometer C11347-01. Fluorescence lifetimes were measured on a HAMAMATSU compact fluorescence lifetime spectrometer C11367.

## Synthesis of thioamide

### *N*-Phenylmethyl-3,5-diphenyl-4-pyridincarboamide

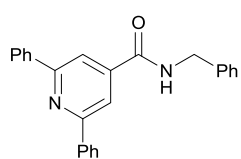

The 2,6-diphenylisonicotinic acid (0.826 g, 3.0 mmol) and 3  $\text{\AA}$  MS (0.27 g) was added benzylamine (0.33 mL, 3.0 mmol) at room temperature, and the mixture was stirred for 46.5 h at 160  $^\circ\text{C}$ . The resulting mixture was filtered, and extracted with methanol. The residue was purified by column chromatography ( $\text{SiO}_2$ ,  $\text{CH}_2\text{Cl}_2$ ) and recrystallized from  $\text{CH}_2\text{Cl}_2$ /hexane to give amide (0.922 g, 84%) as a white solid. (m.p. 178–180  $^\circ\text{C}$ ); IR (KBr) 3285, 3031, 1638, 1537, 1495, 1455, 1404, 1371, 1344, 1274, 1244, 1179, 1072, 918, 784, 683

cm<sup>-1</sup>; <sup>1</sup>H NMR (400 MHz, CD<sub>3</sub>OH) δ 4.64 (d, *J* = 8.0 Hz, 2H, CH<sub>2</sub>), 6.57 (br, 1H, NH), 7.28–7.45 (m, 12H, Ar), 7.82 (s, 2H, Py), 8.09–8.11 (m, 3H, Ar); <sup>13</sup>C NMR (100 MHz, CD<sub>3</sub>COCD<sub>3</sub>) δ 44.2 (CH<sub>2</sub>), 115.9, 127.1, 127.8, 128.0, 128.7, 128.8, 128.9, 129.5, 129.9, 137.0, 137.6, 138.6, 143.3, 157.8, 166.2 (Ar), ; MS (EI) *m/z* 364 (M<sup>+</sup>); HRMS (EI) Calcd for C<sub>25</sub>H<sub>20</sub>N<sub>2</sub>O : 364.1576; found : 364.1588.

### ***N*-Phenylmethyl-3,5-diphenyl-4-pyridincarbothioamide**

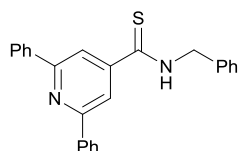

To a solution of *N*-phenylmethyl-3,5-diphenyl-4-pyridincarboamide (0.364 g, 1.0 mmol) in toluene (5.0 mL) was added Lawesson's reagent (0.809 g, 2.0 mmol) at room temperature, and the mixture was stirred for 6 h at 115 °C. The resulting mixture was concentrated in vacuo. The residue was purified by column chromatography (SiO<sub>2</sub>, CH<sub>2</sub>Cl<sub>2</sub>, methanol and hexane : EtOAc = 5 : 1) to give thioamide (0.269 g, 71%) as a yellow solid. (m.p. 166–167 °C); IR (KBr) 3177, 3030, 2916, 1603, 1549, 1495, 1391, 1329, 1259, 1197, 1077, 992, 962, 660 cm<sup>-1</sup>; <sup>1</sup>H NMR (400 MHz, CDCl<sub>3</sub>) δ 5.02 (d, *J* = 4.0 Hz, 2H, CH<sub>2</sub>), 7.38–7.50 (m, 11H, Ar), 7.89 (m, 3H, NH, Py), 8.12 (d, *J* = 8.0 Hz, 4H, Ar); <sup>13</sup>C NMR (100 MHz, CDCl<sub>3</sub>) δ 51.1 (CH<sub>2</sub>), 115.7, 127.2, 128.6, 128.6, 128.9, 129.3, 129.6, 135.8, 138.7, 150.3, 157.7 (Ar), 197.5 (S=C); MS (EI) *m/z* 380 (M<sup>+</sup>); HRMS (EI) Calcd for C<sub>25</sub>H<sub>20</sub>N<sub>2</sub>S : 380.1347; found : 380.1350.

### **General Procedure for the Preparation of Thiazolines.**

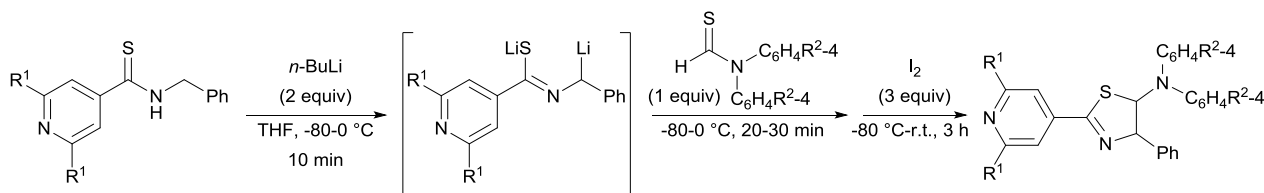

To a solution of thioamide (1 equiv) in THF was added slowly a 1.25 M solution of *n*-butyllithium in *n*-hexane (2 equiv) at -80–0 °C, and the mixture was stirred for 10 min at this temperature. To this was added thioformamide (1 equiv) at -80–0 °C, and the mixture was stirred for 20–30 min at this temperature. To this was added iodine (3 equiv) at -80–0 °C, and the mixture was stirred for 3 h at -80 °C to room temperature. The resulting mixture was poured into a saturated aqueous solution of Na<sub>2</sub>S<sub>2</sub>O<sub>3</sub>, and extracted with Et<sub>2</sub>O. The organic layer was dried over MgSO<sub>4</sub> and concentrated in vacuo. The residue was purified by column chromatography (SiO<sub>2</sub>) to give the corresponding thiazolines.

### **General Procedure for the Preparation of Thiazoles.**

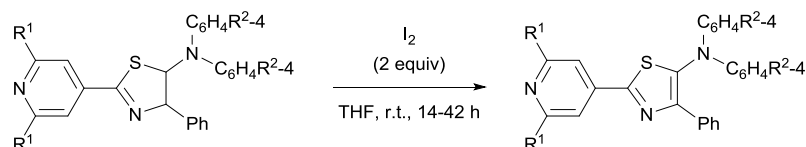

To a solution of thiazoline (1 equiv) in THF was added iodine (2 equiv) at room temperature, and the mixture was stirred for 14–42 h at room temperature. The resulting mixture was poured into a saturated

aqueous solution of Na<sub>2</sub>S<sub>2</sub>O<sub>3</sub>, and extracted with Et<sub>2</sub>O. The organic layer was dried over MgSO<sub>4</sub> and concentrated in vacuo. The residue was purified by column chromatography (SiO<sub>2</sub>) to give the corresponding thiazoles.

**(4R\*,5S\*)-4,5-Dihydro-2-(4-pyridyl)-4-phenyl-N,N-bis(4-methylphenyl)-5-thiazolamine**

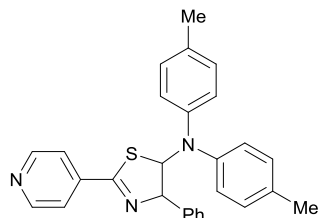

According to the general procedure for thiazolines, the crude material was purified by column chromatography (SiO<sub>2</sub>, hexane : EtOAc = 5 : 1) to give the corresponding thiazoline (0.156 g, 72%) as a yellow oil. : IR (KBr) 3028, 2920, 2859, 1592, 1508, 1407, 1237, 1034, 962, 824, 730, 700 cm<sup>-1</sup>; <sup>1</sup>H NMR (400 MHz, CDCl<sub>3</sub>) δ 2.27 (s, 6H, Me), 6.00 (d, *J* = 4.0 Hz, 1H, SCH), 6.34 (d, *J* = 4 Hz, 1H, NCH), 6.91 (d, *J* = 8 Hz, 4H, Ar), 7.06 (d, *J* = 8 Hz, 4H, Ar), 7.28–7.35 (m, 5H, Ar), 7.63–7.64 (m, 2H, Ar), 7.67–7.68 (m, 2H, Ar); <sup>13</sup>C NMR (100 MHz, CDCl<sub>3</sub>) δ 23.6, 85.4, 85.5, 124.9, 126.2, 129.2, 131.0, 131.8, 132.9, 136.4, 142.4, 143.5, 146.1, 153.2 169.9; MS (EI) *m/z* 435 (M<sup>+</sup>); HRMS (EI) Calcd for C<sub>28</sub>H<sub>25</sub>N<sub>3</sub>OS : 435.1769; found : 435.1761.

**2-(4-Pyridyl)-4-phenyl-N,N-bis(4-methylphenyl)-5-thiazolamine (3)**

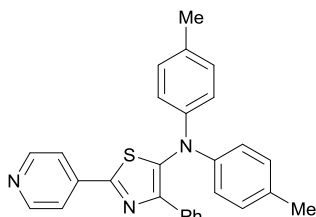

According to the general procedure for thiazoles, compound **3** was prepared. The crude material was purified by column chromatography (SiO<sub>2</sub>, hexane : EtOAc = 3 : 1) to give thiazole **3** (0.09 g, 63%) as an orange oil.: IR (KBr) 3027, 2919, 1595, 1505, 1444, 1345, 1286, 995, 909, 812, 727, 694 cm<sup>-1</sup>; <sup>1</sup>H NMR (400 MHz, CDCl<sub>3</sub>) δ 2.26 (s, 6H, OMe), 6.97–7.03 (m, 7H, Ar), 7.21–7.29 (m, 4H, Ar), 7.79–7.80 (m, 2H, Ar), 7.92–7.94 (m, 2H, Ar), 8.66–8.68 (m, 2H); <sup>13</sup>C NMR (100 MHz, CDCl<sub>3</sub>) δ 23.6 (Me), 122.8, 123.3, 124.5, 130.3, 131.0, 131.1, 132.8, 135.9, 139.6, 143.7, 147.1, 151.5, 153.3 (Ar), 162.3 (SC=N); MS (EI) *m/z* 433 (M<sup>+</sup>); HRMS (EI) Calcd for C<sub>28</sub>H<sub>23</sub>N<sub>3</sub>S : 433.1613; found : 433.1611.

**(4R\*,5S\*)-4,5-Dihydro-2-(4-pyridyl)-4-phenyl-N,N-bis(4-methoxyphenyl)-5-thiazolamine**

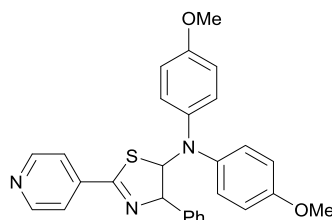

According to the general procedure for thiazolines, the crude material was purified by column chromatography (SiO<sub>2</sub>, hexane : EtOAc = 10 : 1 and 5 : 1) to give the corresponding thiazoline (0.189 g, 81%) as a yellow oil. : IR (KBr) 3037, 2998, 2930, 2832, 1591, 1506, 1242, 1032, 961, 823, 700 cm<sup>-1</sup>; <sup>1</sup>H NMR (400 MHz, CDCl<sub>3</sub>) δ 3.74 (s, 6H, OMe), 6.00 (d, *J* = 4.0 Hz, 1H, SCH), 6.31 (d, *J* = 4 Hz, 1H, NCH), 6.79–6.82 (m, 4H, Ar), 6.95–6.98 (m, 4H, Ar), 7.31–7.35 (m, 5H, Ar), 7.64–7.66 (m, 2H, Ar), 7.68 (d, 4.0 Hz, 2H, Ar); <sup>13</sup>C NMR (100 MHz, CDCl<sub>3</sub>) δ 58.3, 58.4, 85.6, 86.3, 117.6, 125.1, 127.6, 129.1, 129.3, 131.1, 131.6, 142.1, 152.9, 153.0, 159.1, 169.7; MS (EI) *m/z* 465 (M<sup>+</sup>, -2H); HRMS (EI) Calcd for C<sub>28</sub>H<sub>25</sub>N<sub>3</sub>O<sub>2</sub>S : 467.1667; found : 467.1646.

#### 2-(4-Pyridyl)-4-phenyl-*N,N*-bis(4-methoxyphenyl)-5-thiazolamine (4)

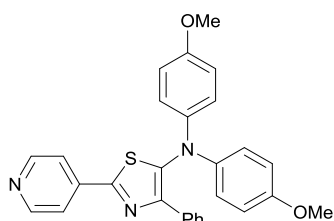

According to the general procedure for thiazoles, compound **4** was prepared. The crude material was purified by column chromatography (SiO<sub>2</sub>, hexane : EtOAc = 3 : 1) to give thiazole **4** (0.05 g, 44%) as a brown oil.: IR (KBr) 2929, 1593, 1504, 1443, 1241, 1779, 1033, 823, 696, 669 cm<sup>-1</sup>; <sup>1</sup>H NMR (400 MHz, CDCl<sub>3</sub>) δ 3.76 (s, 6H, OMe), 6.77–6.79 (m, 4H, Ar), 7.01–7.03 (m, 4H, Ar), 7.21–7.29 (m, 3H, Ar), 7.79–7.81 (m, 2H, Ar), 7.93–7.95 (m, 2H, Ar), 8.68–8.69 (m, 2H); <sup>13</sup>C NMR (100 MHz, CDCl<sub>3</sub>) δ 55.7, 55.9 (OMe), 114.8, 114.9, 120.1, 123.1, 123.4, 127.7, 128.4, 133.4, 140.8, 141.1, 143.9, 148.0, 150.7, 150.9, 156.1 (Ar), 159.0 (SC=N); MS (EI) *m/z* 465 (M<sup>+</sup>); HRMS (EI) Calcd for C<sub>28</sub>H<sub>23</sub>N<sub>3</sub>O<sub>2</sub>S : 465.1511; found : 465.1530.

#### (4R\*,5S\*)-4,5-Dihydro-2-(3,5-diphenyl-4-pyridyl)-4-phenyl-*N,N*-diphenyl-5-thiazolamine

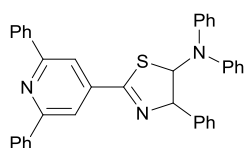

According to the general procedure for thiazolines, the crude material was purified by column chromatography (SiO<sub>2</sub>, hexane : EtOAc = 20 : 1) to give the corresponding thiazoline (0.136 g, 49%) as a pale yellow solid. (m.p. 87–90 °C) : IR (KBr) 3429, 3033, 1592, 1578, 1551, 1492, 1449, 1405, 1352, 1248, 1206, 1179, 1032, 906, 692 cm<sup>-1</sup>; <sup>1</sup>H NMR (400 MHz, CDCl<sub>3</sub>) δ 6.11 (d, *J* = 4.0 Hz, 1H, SCH), 6.41 (d, *J* = 4.0 Hz, 1H, NCH), 7.07–7.12 (m, 6H, Ar), 7.28–7.38 (m, 8H, Ar), 7.42–7.52 (m, 7H, Ar), 8.05 (s, 2H, Py), 8.19 (d, *J* = 4.0 Hz, 4H, Ar); <sup>13</sup>C NMR (100 MHz, CDCl<sub>3</sub>) δ 82.0, 82.7, 117.1, 123.5, 124.1, 126.4, 127.1, 128.2, 128.7, 129.0, 129.3, 129.5, 138.8, 139.3, 142.2, 145.5, 157.6 (Ar), 167.5 (SC=N); MS (EI) *m/z* 559 (M<sup>+</sup>); HRMS (EI) Calcd for C<sub>38</sub>H<sub>29</sub>N<sub>3</sub>S : 559.2082; found : 559.2077.

#### 2-(3,5-Diphenyl-4-Pyridyl)-4-phenyl-*N,N*-diphenyl-5-thiazolamine (6)

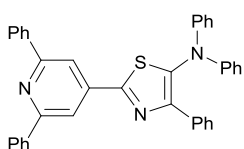

According to the general procedure for thiazoles, compound **6** was prepared. The crude material was purified by column chromatography (SiO<sub>2</sub>, hexane : EtOAc = 20 : 1) and GPC to give thiazole **6** (0.05 g, 65%) as a yellow solid. (m.p. 240–242 °C): IR (KBr) 3435, 1595, 152, 1524, 1488, 1443, 1352, 1306, 1271, 1154, 1072, 908, 777, 693 cm<sup>-1</sup>; <sup>1</sup>H NMR (400 MHz, CDCl<sub>3</sub>) δ 7.02 (t, *J* = 4.0 Hz, 2H, Ar), 7.14–7.16 (m, 4H, Ar), 7.23–7.29 (m, 7H, Ar), 7.45–7.47 (m, 2H, Ar), 7.49–7.53 (m, 4H, Ar), 7.94–7.96 (m, 2H, Ar), 8.20–8.23 (m, 6H, Ar); <sup>13</sup>C NMR (100 MHz, CDCl<sub>3</sub>) δ 115.2, 121.8, 123.6, 127.2, 127.6, 128.4, 128.8, 129.5, 133.1, 139.1, 142.0, 142.5, 146.5, 148.9, 149.2, 157.9, 159.4 (Ar), 160.8 (SC=N); MS (EI) *m/z* 557 (M<sup>+</sup>); HRMS (EI) Calcd for C<sub>38</sub>H<sub>27</sub>N<sub>3</sub>S : 557.1926; found : 557.1923.

#### 2-(4-Pyridyl)-4-phenyl-*N,N*-bis(4-hydroxyphenyl)-5-thiazolamine (5)

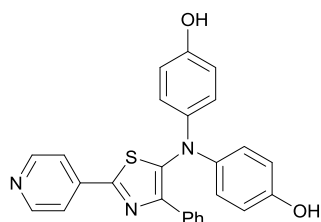

To a 5-*N,N*-bis(4-methoxyphenyl)thiazole **4** (0.028 g, 0.06 mmol) was added HBr (0.1 mL) at room temperature, and the mixture was stirred for 13 h at 100 °C. The resulting mixture was poured into a saturated aqueous solution of K<sub>2</sub>CO<sub>3</sub>, and extracted with EtOAc. The organic layer was dried over Na<sub>2</sub>SO<sub>4</sub>

and concentrated in vacuo. The residue was purified by column chromatography (SiO<sub>2</sub>, 5–7% MeOH in CH<sub>2</sub>Cl<sub>2</sub>) to give thiazole **5** (0.023 g, 90%) as a yellow solid. (m.p. 272–274 °C); IR (KBr) 3391, 3233, 3043, 3025, 2796, 1602, 1507, 1441, 1242, 1213, 830, 695 cm<sup>-1</sup>; <sup>1</sup>H NMR (400 MHz, CD<sub>3</sub>OH) δ 6.62–6.65 (m, 4H, Ar), 6.85–6.87 (m, 4H, Ar), 7.18–7.23 (m, 3H, Ar), 7.82–7.84 (m, 2H, Ar), 7.88–7.90 (m, 2H, Ar), 8.57–8.59 (m, 2H, Ar) The protons due to OH were not observed.; <sup>13</sup>C NMR (100 MHz, CD<sub>3</sub>COCD<sub>3</sub>) δ 116.6, 117.4, 120.9, 124.7, 128.8, 129.3, 129.5, 134.9, 141.3, 148.0, 152.1, 155.2, 159.5, 165.2; MS (EI) *m/z* 437 (M<sup>+</sup>); HRMS (EI) Calcd for C<sub>26</sub>H<sub>19</sub>N<sub>3</sub>O<sub>2</sub>S : 437.1198; found : 437.1212.

### Photophysical properties and spectra (The addition of Brønsted acids)

Fig. S1 The excitation and fluorescent spectra of **7** with TfOH in CH<sub>3</sub>CN

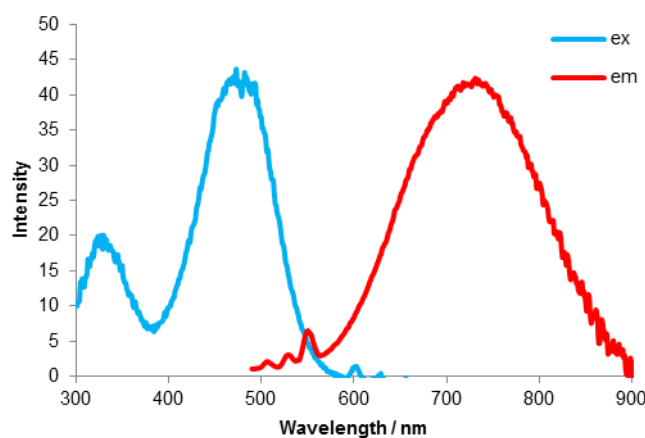

Spectra of thiazole **3–6** and **8–11** were measured in Et<sub>2</sub>O (Table 2). Fluorescent spectra of **8–10** were not observed because of their weak fluorescent intensities.

Fig. S2 Absorption spectra of **3** and **8**

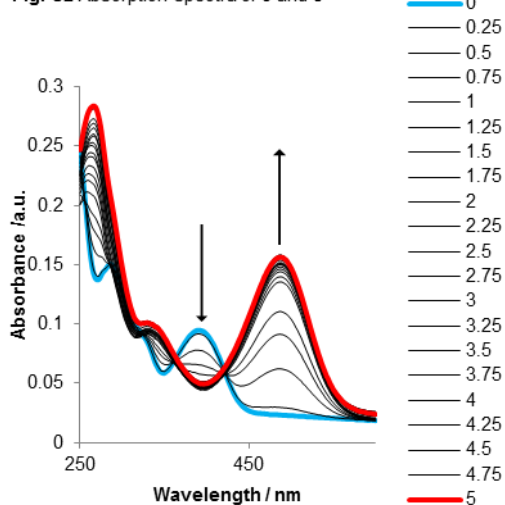

Fig. S3 Fluorescent spectra of **3** and **8**

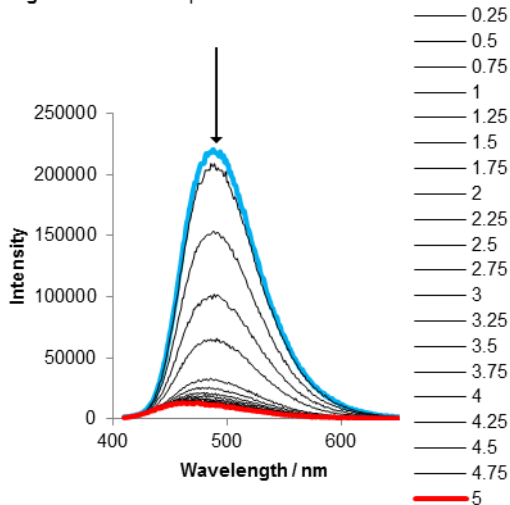

Fig. S4 Absorption spectra of 4 and 9

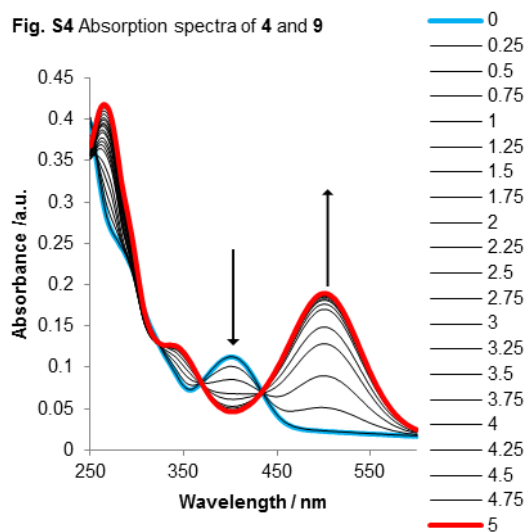

Fig. S5 Fluorescent spectra of 4 and 9

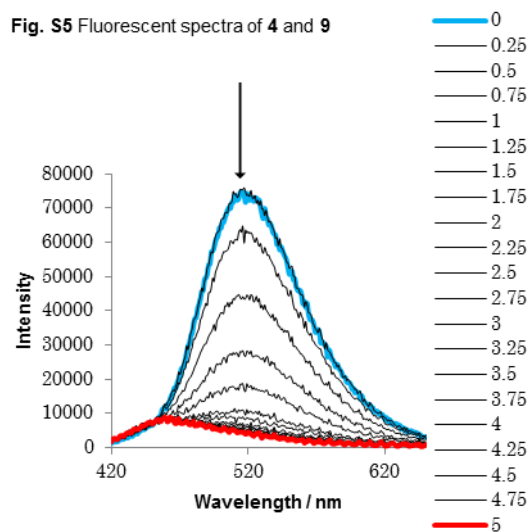

Fig. S6 Absorption spectra of 5 and 10

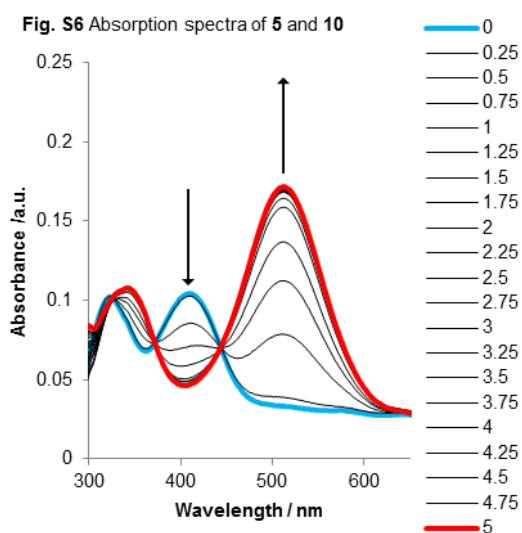

Fig. S7 Fluorescent spectra of 5 and 10

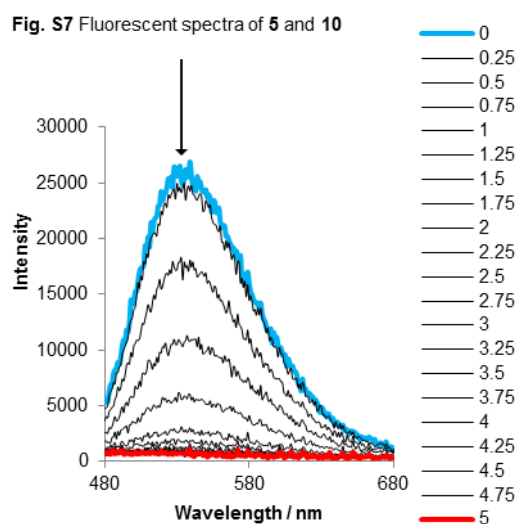

Fig. S8. Absorption spectra of 6 and 11

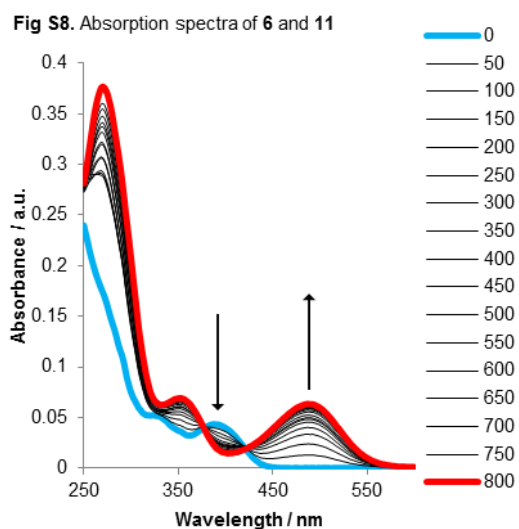

Fig. S9 Fluorescent spectra of 6 and 11

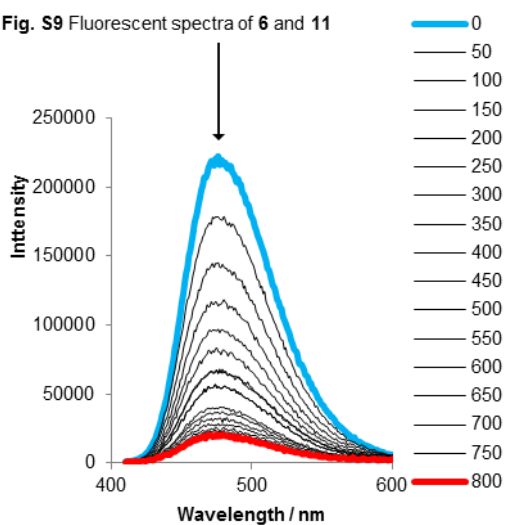



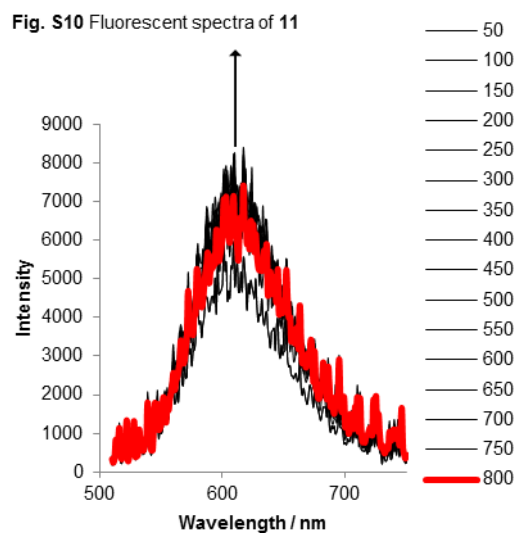

The addition of HCl to thiazole **2**, shifted its wavelengths of absorption and emission to longer wavelengths by 83 nm and 108 nm, respectively (Table S1, entry 1). However, **2** did not show any changes when adding TFA and CH<sub>3</sub>COOH (entries 2 and 3).

**Table S1.** Photophysical properties of thiazole **2** and **12**<sup>a</sup>

| entry | $\lambda_{\text{abs}}$ (nm) | $\lambda_{\text{em}}$ (nm) <sup>b</sup> | acid                 | IP <sup>c</sup> (nm) | $\lambda_{\text{abs}}$ (nm) | $\lambda_{\text{em}}$ (nm) <sup>b</sup> |
|-------|-----------------------------|-----------------------------------------|----------------------|----------------------|-----------------------------|-----------------------------------------|
| 1     | 382                         | 472                                     | HCl                  | 412                  | <b>12</b> 465               | 580                                     |
| 2     | 382                         | 472                                     | TFA                  | -                    | -                           | -                                       |
| 3     | 382                         | 472                                     | CH <sub>3</sub> COOH | -                    | -                           | -                                       |

<sup>a</sup>In Et<sub>2</sub>O, c = 10<sup>-5</sup> M. <sup>b</sup>Excited at wavelength of maximum absorption. <sup>c</sup>IP stands for isosbestic point.

**Fig. S11** Absorption spectra of **2** with HCl

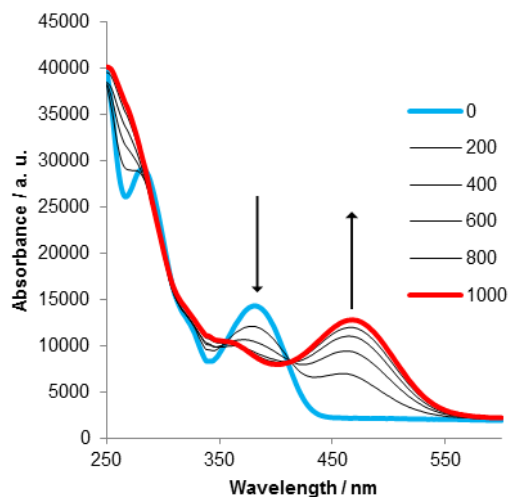

**Fig. S12** Fluorescent spectra of **2** with HCl

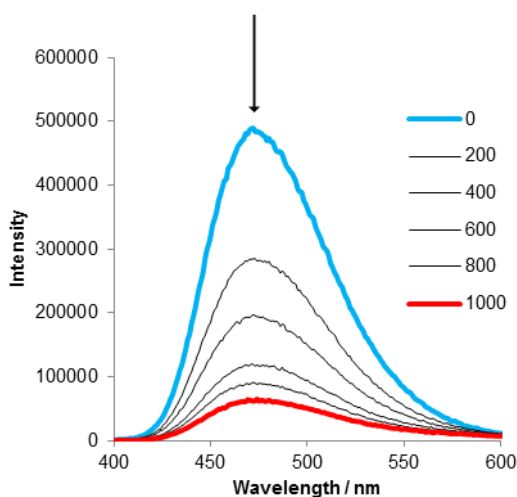

Fig. S13 Fluorescent spectra of 12

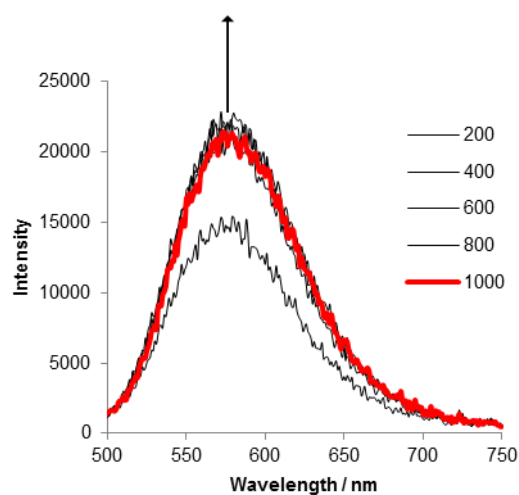

### Photophysical properties and spectra (The addition of Lewis acids)

Fig. S14 Absorption spectra of 2·BCl<sub>3</sub>

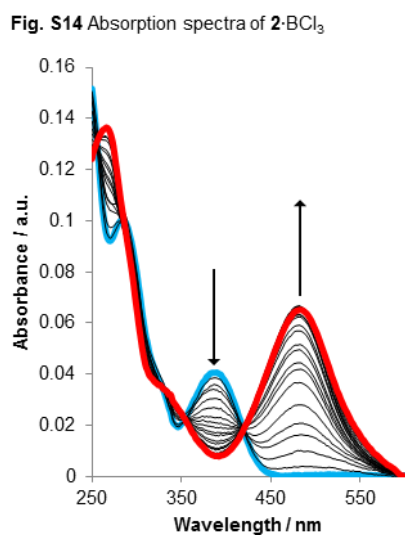

Fig. S15 Fluorescent spectra of 2 with BCl<sub>3</sub>

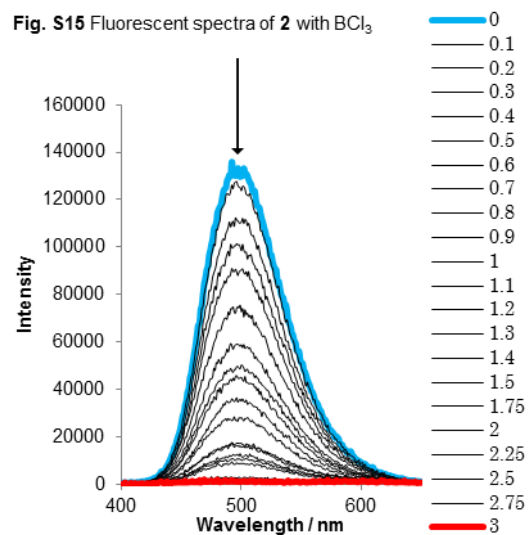

Fig. S16 Fluorescent spectra of 2·BCl<sub>3</sub>

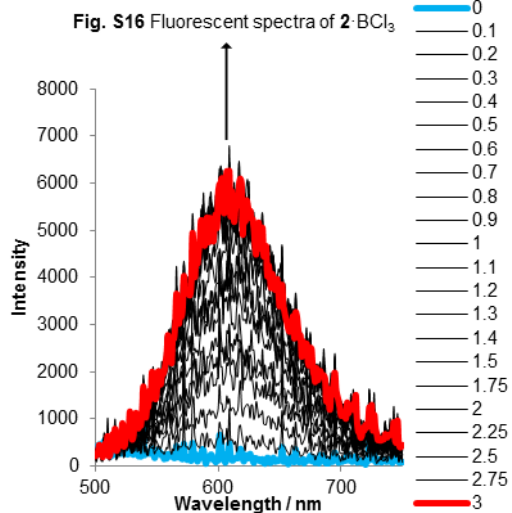

Fig. S17 Absorption spectra of 2·AlCl<sub>3</sub>

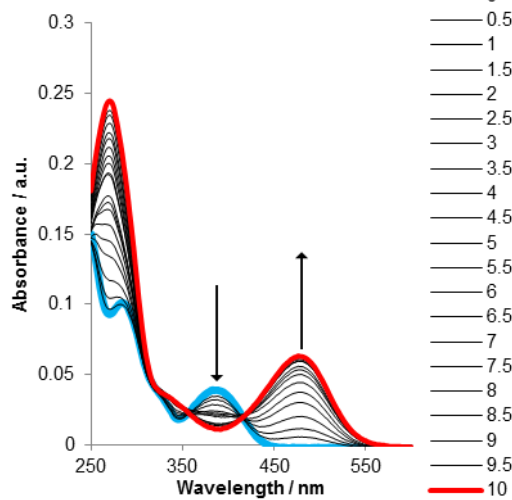

Fig. S18 Fluorescent spectra of 2 with AlCl<sub>3</sub>

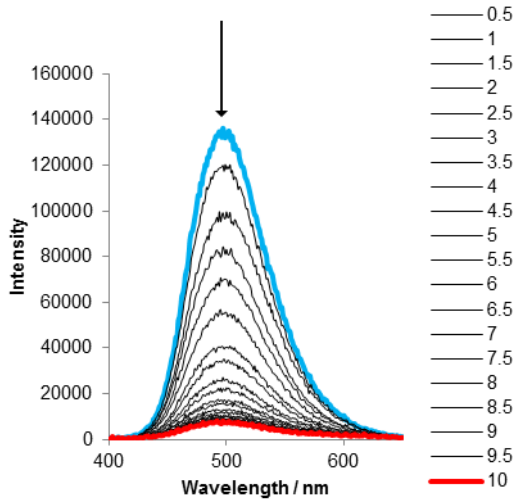

Fig. S19 Fluorescent spectra of 2·AlCl<sub>3</sub>

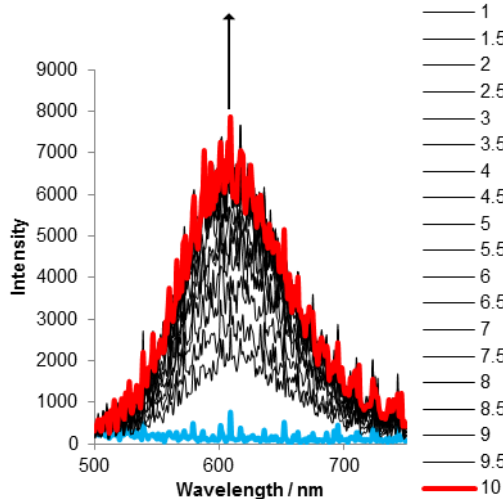

Fig. S20 Absorption spectra of 2·GaCl<sub>3</sub>

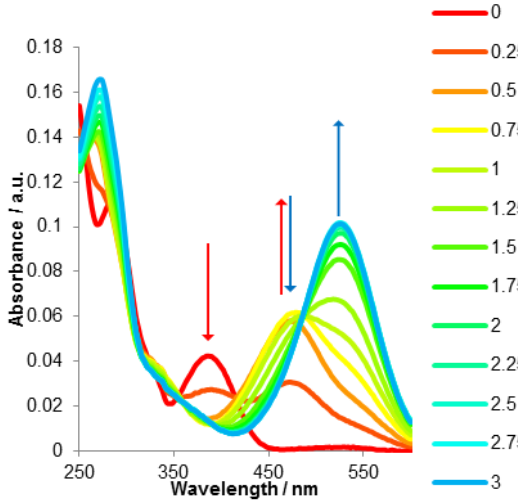

Fig. S21 Fluorescent spectra of 2 with GaCl<sub>3</sub>

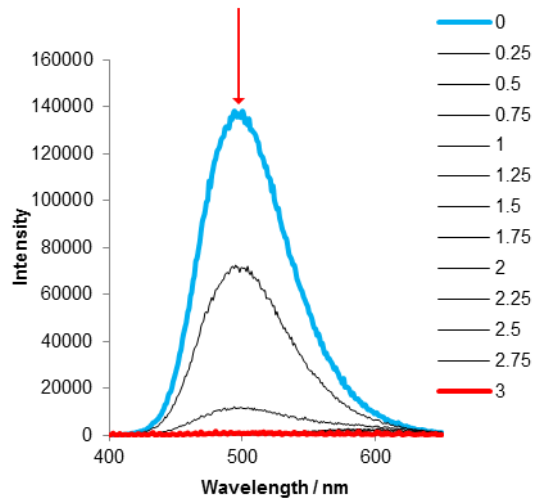

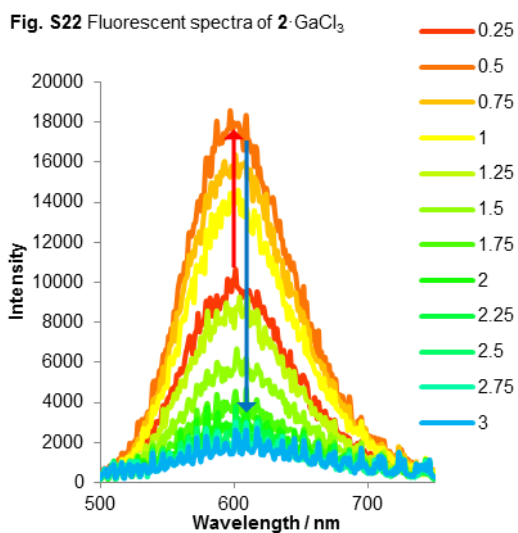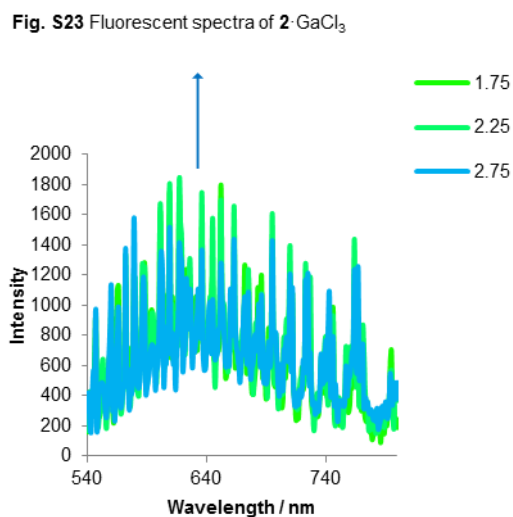

Photophysical properties of the mixture of thiazole **2** and Lewis acids were measured in CH<sub>2</sub>Cl<sub>2</sub>. The reaction of **2** and GaCl<sub>3</sub> passed through two steps (0.25–0.5 equiv. and 0.75–3 equiv. of GaCl<sub>3</sub>). The red arrow indicates the equivalents of GaCl<sub>3</sub> from 0.25 to 0.5 equiv. While, the blue arrow indicates the equivalents of GaCl<sub>3</sub> from 0.75 to 3 equiv.

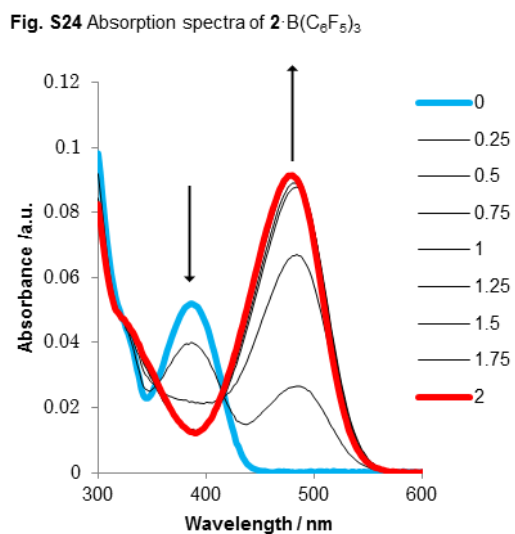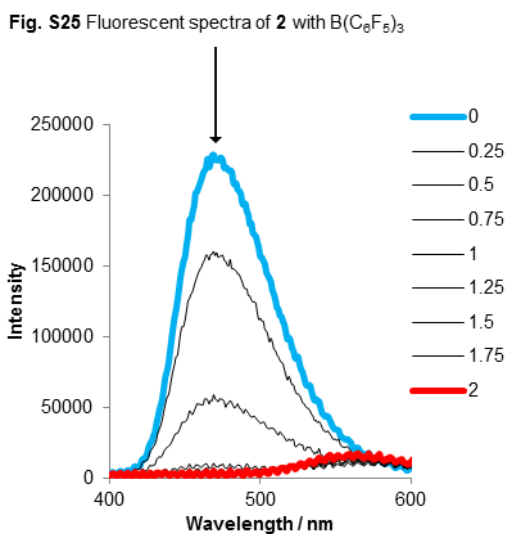

Fig. S26 Fluorescent spectra of 2-B(C<sub>6</sub>F<sub>5</sub>)<sub>3</sub>

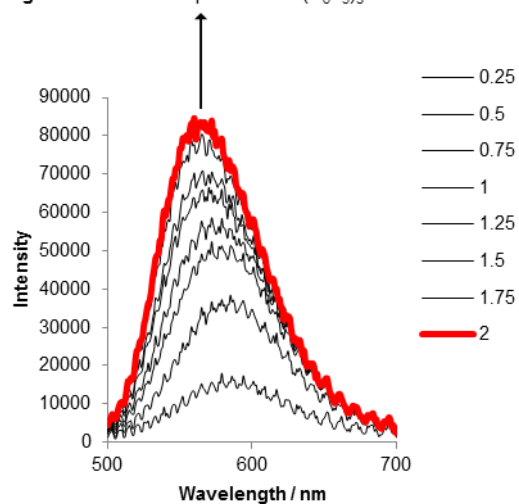

Fig. S27 Absorption spectra of 6-B(C<sub>6</sub>F<sub>5</sub>)<sub>3</sub>

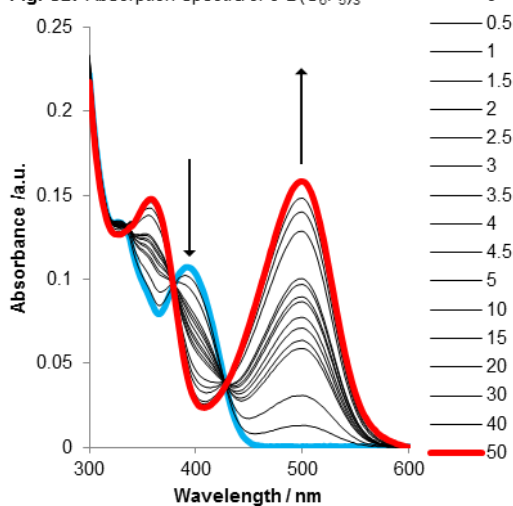

Fig. S28 Fluorescent spectra of 6 with B(C<sub>6</sub>F<sub>5</sub>)<sub>3</sub>

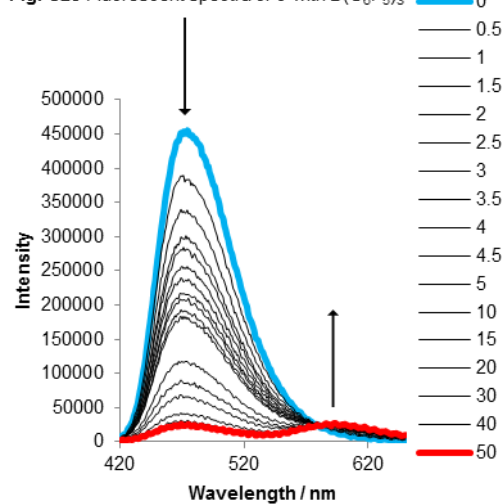

Fig. S29 Fluorescent spectra of 6-B(C<sub>6</sub>F<sub>5</sub>)<sub>3</sub>

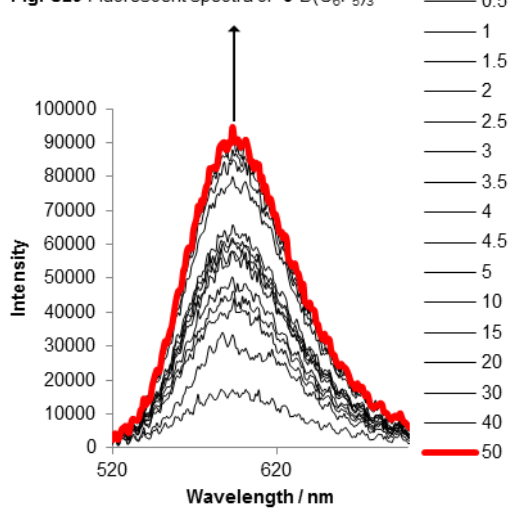

The spectra of absorption and emission of **2** and **6** changed by adding B(C<sub>6</sub>F<sub>5</sub>)<sub>3</sub>.

## CIE coordinates

**Table S2.** CIE data of **2** with 0-3 equivalents of  $B(C_6F_5)_3$ <sup>a</sup>

| equiv <sup>b</sup> | x    | y    |
|--------------------|------|------|
| 0                  | 0.16 | 0.29 |
| 0.25               | 0.19 | 0.31 |
| 0.5                | 0.31 | 0.35 |
| 0.75               | 0.40 | 0.38 |
| 1                  | 0.45 | 0.41 |
| 1.25               | 0.47 | 0.42 |
| 1.5                | 0.49 | 0.43 |
| 1.75               | 0.49 | 0.44 |
| 2                  | 0.50 | 0.44 |
| 3                  | 0.51 | 0.45 |

<sup>a</sup>In toluene,  $c = 10^{-5}$  M. Excited at 365 nm.

<sup>b</sup>Equivalents of  $B(C_6F_5)_3$

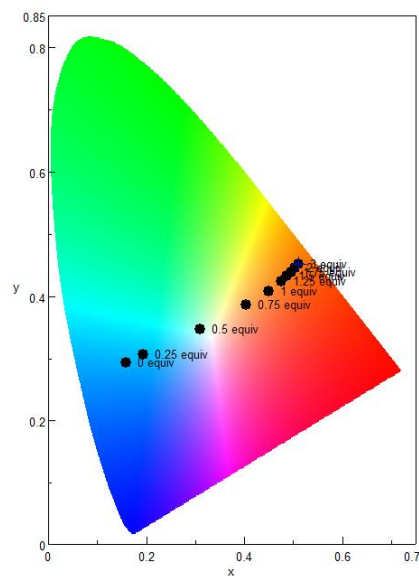

CIE coordinates of solution **2** and  $B(C_6F_5)_3$  were plotted from the emission spectra (Figure 3 (b), Table S2). The color of the solution changed more drastically than that of **6**. The solution **2** showed bluish white emission when 0.5 equivalents of  $B(C_6F_5)_3$  were added.

**Fig. S30** Fluorescent spectra of **6**·B(C<sub>6</sub>F<sub>5</sub>)<sub>3</sub> for CIE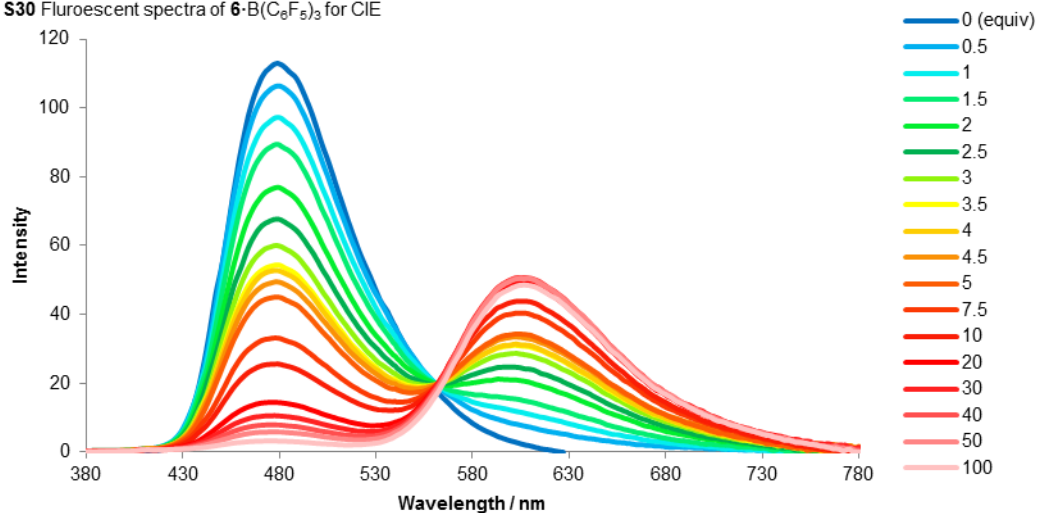**Table S3.** CIE data of **6** with 0-100 equivalents of B(C<sub>6</sub>F<sub>5</sub>)<sub>3</sub><sup>a</sup>

| equiv <sup>b</sup> | x    | y    |
|--------------------|------|------|
| 0                  | 0.15 | 0.32 |
| 0.5                | 0.18 | 0.33 |
| 1                  | 0.20 | 0.33 |
| 1.5                | 0.21 | 0.33 |
| 2                  | 0.25 | 0.34 |
| 2.5                | 0.27 | 0.34 |
| 3                  | 0.30 | 0.34 |
| 3.5                | 0.31 | 0.35 |
| 4                  | 0.32 | 0.35 |
| 4.5                | 0.33 | 0.35 |
| 5                  | 0.35 | 0.35 |
| 7.5                | 0.40 | 0.36 |
| 10                 | 0.43 | 0.37 |
| 20                 | 0.50 | 0.38 |
| 30                 | 0.52 | 0.38 |
| 40                 | 0.54 | 0.39 |
| 50                 | 0.55 | 0.39 |
| 100                | 0.58 | 0.39 |

<sup>a</sup>In toluene, c = 10<sup>-5</sup> M. Excited at 365 nm.<sup>b</sup>Equivalents of B(C<sub>6</sub>F<sub>5</sub>)<sub>3</sub>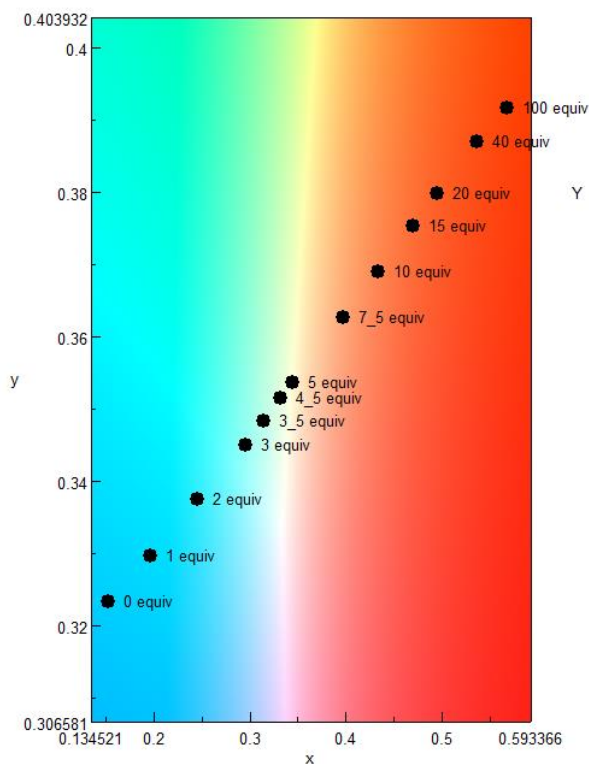

CIE calculated from emission spectra of solution **6** and B(C<sub>6</sub>F<sub>5</sub>)<sub>3</sub> (Figure S31, Table S3). The emission color of solution **6** and B(C<sub>6</sub>F<sub>5</sub>)<sub>3</sub> gradually changed from blue to white and orange.

## DFT calculations

All calculations were carried out using the GAUSSIAN 09 program.<sup>[2]</sup> Geometry optimization was performed with hybrid density functional theory (DFT) at the B3LYP<sup>[3]</sup> level, by using the 6-31+G(d,p) basis set for all atoms. The UV/Vis absorption spectra of optimized geometries were calculated with the time dependent (TD) DFT method at CAM-B3LYP<sup>[4]</sup> level. Solvent effects were taken into account by means of polarized continuum model (PCM)<sup>[5]</sup> calculations. The results for **2** and **7** are shown in Figures S31 and S32 respectively, and the energy levels of their HOMO and LUMO, and NBO charges are summarized in Table S4. XYZ Coordinates are uploaded as a separate Supporting Information.

Figure. S31 Results of DFT calculation of **2**

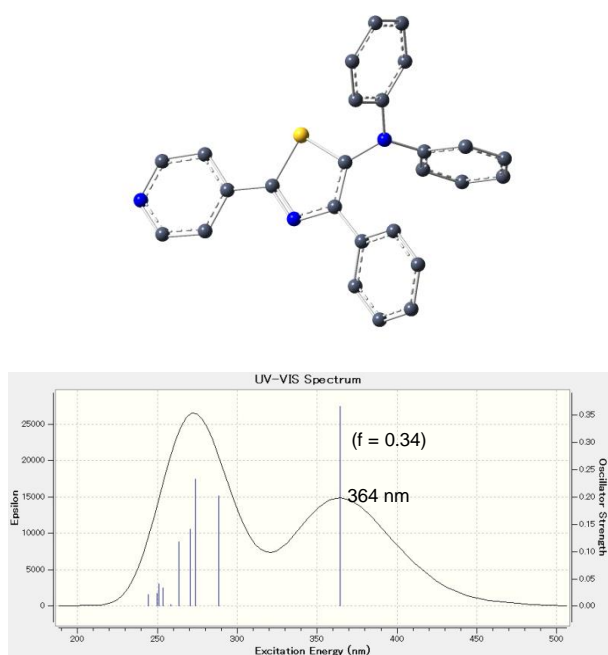

Figure. S32 Results of DFT calculation of **7•H<sub>2</sub>O**

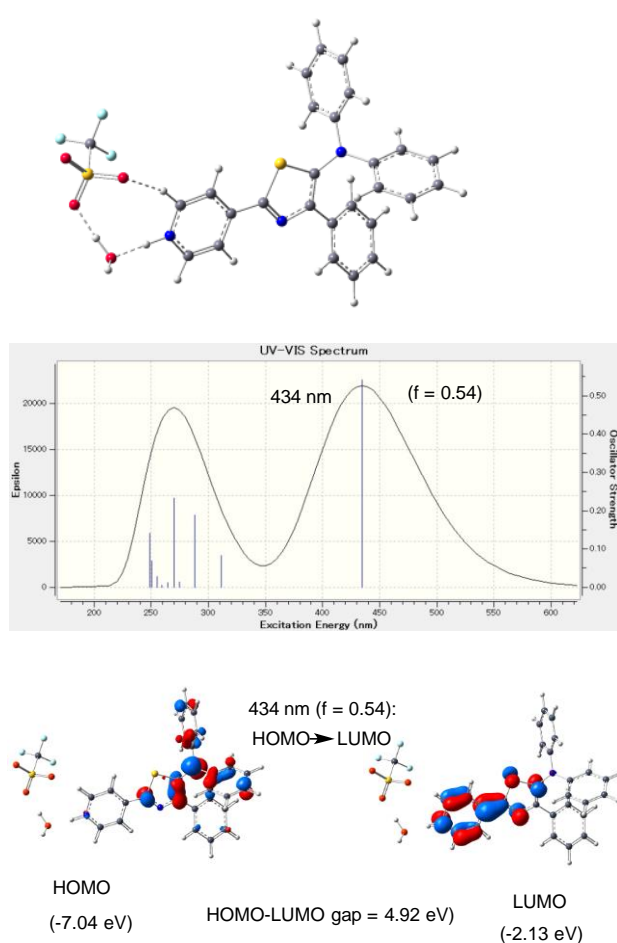

Table S4. Summary of energy and energy gaps of HOMO and LUMO of **2** and **7•H<sub>2</sub>O**

|                         | HOMO (eV)           | LUMO (eV)            | HOMO-LUMO gap (eV) |
|-------------------------|---------------------|----------------------|--------------------|
| <b>2</b>                | -6.85               | -1.14                | 5.71               |
| <b>7•H<sub>2</sub>O</b> | -7.05<br>(0.2 down) | -2.13<br>(0.99 down) | 4.92               |



The calculated UV-vis absorption spectra for **2** and **7** at CAM-B3LYP level show a red shift of 70 nm in absorption maximum from 364 nm in **2** to 434 nm in **7** after protonation, which is consistent with the experimental results in Table 1 exhibiting a substantial red shift of 93 nm from 382 nm in **2** to 475 nm in protonated **7**. To find possible origins of such remarkably red-shifted absorption of **7**, we investigated their electronic properties in details. TD-DFT results indicated that the maximum absorption is mainly assigned to HOMO-LUMO transition for both of **2** and **7**, as shown in Fig. S32 and S33. Interestingly, LUMO orbital has a great contribution from the pyridyl group, whereas HOMO orbital is basically from aminothiazole fragment and almost none from the pyridyl group. It is noticed that protonation of **2** leads to lowering of both HOMO and LUMO orbitals. But LUMO orbital is much more strongly lowered by 0.99 eV in energy, compared with HOMO orbital with lowering of 0.2 eV, as shown in Table S4. Consequently, the HOMO-LUMO electronic band gap significantly drops down by 0.79 eV from 5.71 eV to 4.92 eV, which is probably the origin for the intense red-shifted absorption in **7**.

## X-ray structure analyses

The X-ray quality crystals were obtained by slow diffusion of hexane into CH<sub>2</sub>Cl<sub>2</sub> solutions of **2** and **7**. The crystal was cut from the grown crystals and was mounted on a glass fiber. Intensity data were collected on a RIGAKU Saturn70 CCD system with VariMax Mo Optic using MoK $\alpha$  radiation ( $\lambda = 0.71075 \text{ \AA}$ ). X-ray absorption was corrected by multi-scan methods.<sup>[6],[7]</sup> The structures were solved by direct method using SHELXS-97 and refined by the full-matrix least-squares method on  $F^2$  using SHLEXL-97.<sup>[8]</sup> Structure determination was carried out using the free GUI software of Yadokari-XG 2009.<sup>[9]</sup> Crystal data and structure refinement are summarized in the Tables S5 and S6.

### Crystal data and structure refinement

**Table S5.** Crystal data and structure refinement for **2**

|                                              |                                                                                                  |
|----------------------------------------------|--------------------------------------------------------------------------------------------------|
| Empirical formula                            | C <sub>26</sub> H <sub>19</sub> N <sub>3</sub> S                                                 |
| Formula weight                               | 405.50                                                                                           |
| Temperature                                  | 103(2) K                                                                                         |
| Wavelength                                   | 0.71075 Å                                                                                        |
| Crystal system                               | Orthorhombic                                                                                     |
| Space group                                  | <i>Pbca</i>                                                                                      |
| Unit cell dimensions                         | a = 7.4437(4) Å      a = 90°<br>b = 20.0110(11) Å      b = 90°<br>c = 26.7323(16) Å      g = 90° |
| Volume                                       | 3981.9(4) Å <sup>3</sup>                                                                         |
| Z                                            | 8                                                                                                |
| Density (calculated)                         | 1.353 Mg/m <sup>3</sup>                                                                          |
| Absorption coefficient                       | 0.181 mm <sup>-1</sup>                                                                           |
| <i>F</i> (000)                               | 1696                                                                                             |
| Crystal size                                 | 0.08 x 0.02 x 0.01 mm <sup>3</sup>                                                               |
| Theta range for data collection              | 1.52 to 25.50°                                                                                   |
| Index ranges                                 | -8 ≤ h ≤ 9, -24 ≤ k ≤ 23, -32 ≤ l ≤ 32                                                           |
| Reflection collected                         | 50863                                                                                            |
| Independent reflections                      | 3703 [ <i>R</i> (int) = 0.2451]                                                                  |
| Completeness to theta = 27.50°               | 100.0%                                                                                           |
| Max. min. transmission                       | 0.9982 and 0.9857                                                                                |
| Refinement method                            | Full-matrix least-squares on $F^2$                                                               |
| Data / restraints / parameters               | 3703 / 0 / 271                                                                                   |
| Goodness-of-fit on $F^2$                     | 1.046                                                                                            |
| Final R indices [ <i>I</i> > 2σ( <i>I</i> )] | <i>R</i> <sub>1</sub> = 0.0739, w <i>R</i> <sub>2</sub> = 0.1698                                 |
| R indices (all data)                         | <i>R</i> <sub>1</sub> = 0.1386, w <i>R</i> <sub>2</sub> = 0.2148                                 |
| Largest diff. peak and hole                  | 0.524 and -0.640 e.Å <sup>-3</sup>                                                               |

**Table S6.** Crystal data and structure refinement for **7**

|                                        |                                                                  |                     |
|----------------------------------------|------------------------------------------------------------------|---------------------|
| Empirical formula                      | $C_{27}H_{22}F_3N_3O_4S_2$                                       |                     |
| Formula weight                         | 573.60                                                           |                     |
| Temperature                            | 103(2) K                                                         |                     |
| Wavelength                             | 0.71075 Å                                                        |                     |
| Crystal system                         | Monoclinic                                                       |                     |
| Space group                            | $P2_1/n$                                                         |                     |
| Unit cell dimensions                   | $a = 11.8558(6)$ Å                                               | $a = 90^\circ$      |
|                                        | $b = 6.8270(3)$ Å                                                | $b = 90.959^\circ$  |
|                                        | $c = 31.3378(18)$ Å                                              | $\gamma = 90^\circ$ |
| Volume                                 | $2536.1(2)$ Å <sup>3</sup>                                       |                     |
| Z                                      | 4                                                                |                     |
| Density (calculated)                   | 1.502 Mg/m <sup>3</sup>                                          |                     |
| Absorption coefficient                 | 0.273 mm <sup>-1</sup>                                           |                     |
| $F(000)$                               | 1184                                                             |                     |
| Crystal size                           | 0.08 x 0.04 x 0.01 mm <sup>3</sup>                               |                     |
| Theta range for data collection        | 1.83 to 25.50°                                                   |                     |
| Index ranges                           | $-14 \leq h \leq 14$ , $-8 \leq k \leq 8$ , $-37 \leq l \leq 37$ |                     |
| Reflection collected                   | 22829                                                            |                     |
| Independent reflections                | 4583 [ $R_{int} = 0.1152$ ]                                      |                     |
| Completeness to $\theta = 27.50^\circ$ | 97.0%                                                            |                     |
| Max. min. transmission                 | 0.9973 and 0.9785                                                |                     |
| Refinement method                      | Full-matrix least-squares on $F^2$                               |                     |
| Data / restraints / parameters         | 4583 / 4 / 358                                                   |                     |
| Goodness-of-fit on $F^2$               | 1.018                                                            |                     |
| Final R indices [ $I > 2\sigma(I)$ ]   | $R_1 = 0.0720$ , $wR_2 = 0.1577$                                 |                     |
| R indices (all data)                   | $R_1 = 0.1624$ , $wR_2 = 0.2070$                                 |                     |
| Largest diff. peak and hole            | 0.977 and -0.368 e.Å <sup>-3</sup>                               |                     |

Planes for the calculations of dihedral angles A-2, A-4, and A-5 of **2** and **7** are shown in Figures S33–S38.

Figure. S33 Two planes for the calculation of dihedral angle A-2 of **2**

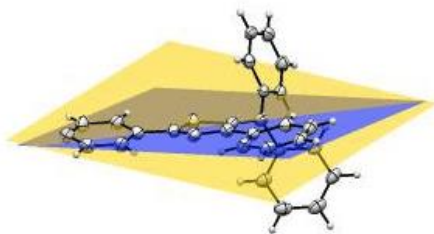

Figure. S36 Two planes for the calculation of dihedral angle A-2 of **7**

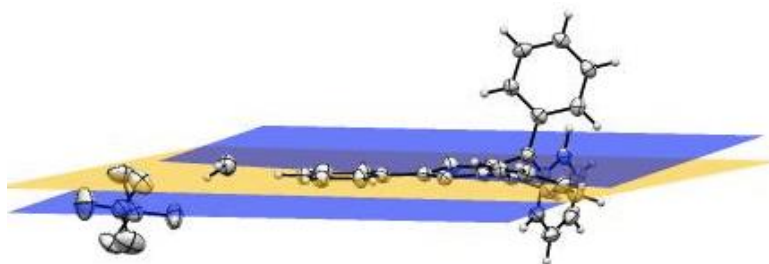

Figure. S34 Two planes for the calculation of dihedral angle A-4 of **2**

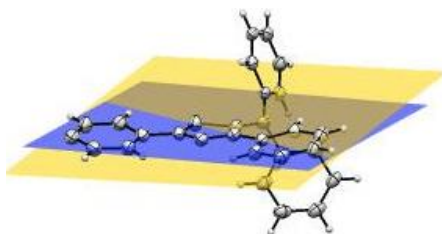

Figure. S37 Two planes for the calculation of dihedral angle A-4 of **7**

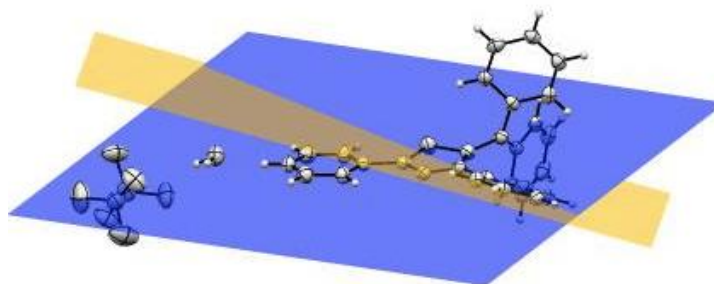

Figure. S35 Two planes for the calculation of dihedral angle A-5 of **2**

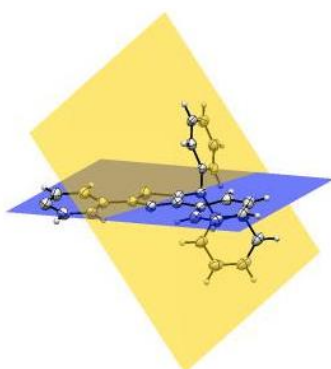

Figure. S38 Two planes for the calculation of dihedral angle A-5 of **7**

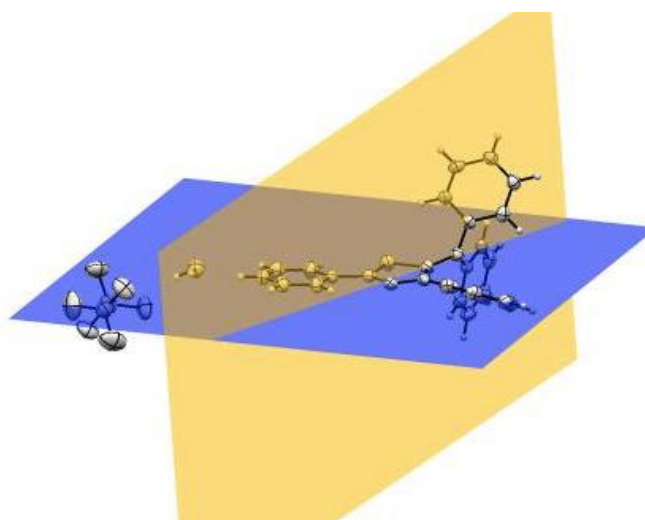

## References.

- [1] T. Murai, K. Yamaguchi, F. Hori, T. Maruyama, *J. Org. Chem.* **2014**, *79*, 4930; K. Yamaguchi, T. Murai, S. Hasegawa, Y. Miwa, S. Kutsumizu, T. Maruyama, T. Sasamori, N. Tokitoh, *J. Org. Chem.* **2015**, *80*, 10742.
- [2] Gaussian 09, Revision E.01, M. J. Frisch, G. W. Trucks, H. B. Schlegel, G. E. Scuseria, M. A. Robb, J. R. Cheeseman, G. Scalmani, V. Barone, B. Mennucci, G. A. Petersson, H. Nakatsuji, M. Caricato, X. Li, H. P. Hratchian, A. F. Izmaylov, J. Bloino, G. Zheng, J. L. Sonnenberg, M. Hada, M. Ehara, K. Toyota, R. Fukuda, J. Hasegawa, M. Ishida, T. Nakajima, Y. Honda, O. Kitao, H. Nakai, T. Vreven, J. A. Montgomery, Jr., J. E. Peralta, F. Ogliaro, M. Bearpark, J. J. Heyd, E. Brothers, K. N. Kudin, V. N. Staroverov, T. Keith, R. Kobayashi, J. Normand, K. Raghavachari, A. Rendell, J. C. Burant, S. S. Iyengar, J. Tomasi, M. Cossi, N. Rega, J. M. Millam, M. Klene, J. E. Knox, J. B. Cross, V. Bakken, C. Adamo, J. Jaramillo, R. Gomperts, R. E. Stratmann, O. Yazyev, A. J. Austin, R. Cammi, C. Pomelli, J. W. Ochterski, R. L. Martin, K. Morokuma, V. G. Zakrzewski, G. A. Voth, P. Salvador, J. J. Dannenberg, S. Dapprich, A. D. Daniels, O. Farkas, J. B. Foresman, J. V. Ortiz, J. Cioslowski, D. J. Fox, Gaussian, Inc., Wallingford CT, 2013
- [3] A. D. Becke, *Phys. Rev. A* **1988**, *38*, 3098; A. D. Becke, *J. Chem. Phys.* **1993**, *98*, 5648; C. Lee, W. Yang, R. G. Parr, *Phys. Rev. B* **1988**, *37*, 785.
- [4] T. Yanai, D. Tew, N. Handy, *Chem. Phys. Lett.* **2004**, *393*, 51.
- [5] S. Miertus, E. Scrocco, J. Tomasi, *Chem. Phys.* **1981**, *55*, 117; J. Tomasi, B. Mennucci, R. Cammi, *Chem. Rev.* **2005**, *105*, 2999.
- [6] Jacobson, R. REQAB Empirical Absorption Correction (Version 1.1-0301998). Molecular Structure Corp.: Woodlands, TX, 1996–1998.
- [7] R. H. Blessing, *Acta Crystallogr.* **1995**, *A51*, 33.
- [8] G. M. Sheldrick, *Acta Crystallogr.* **2008**, *A64*, 112.
- [9] Yadokari-XG, Software for Crystal Structure Analyses, K. Wakita, 2001; Release of Software (Yadokari-XG 2009) for Crystal Structure Analyses, C. Kabuto, S. Akine, T. Nemoto, E. J. Kwon, *Cryst. Soc. Jpn.* **2009**, *51*, 218.

# $^1\text{H}$ and $^{13}\text{C}$ NMR spectra

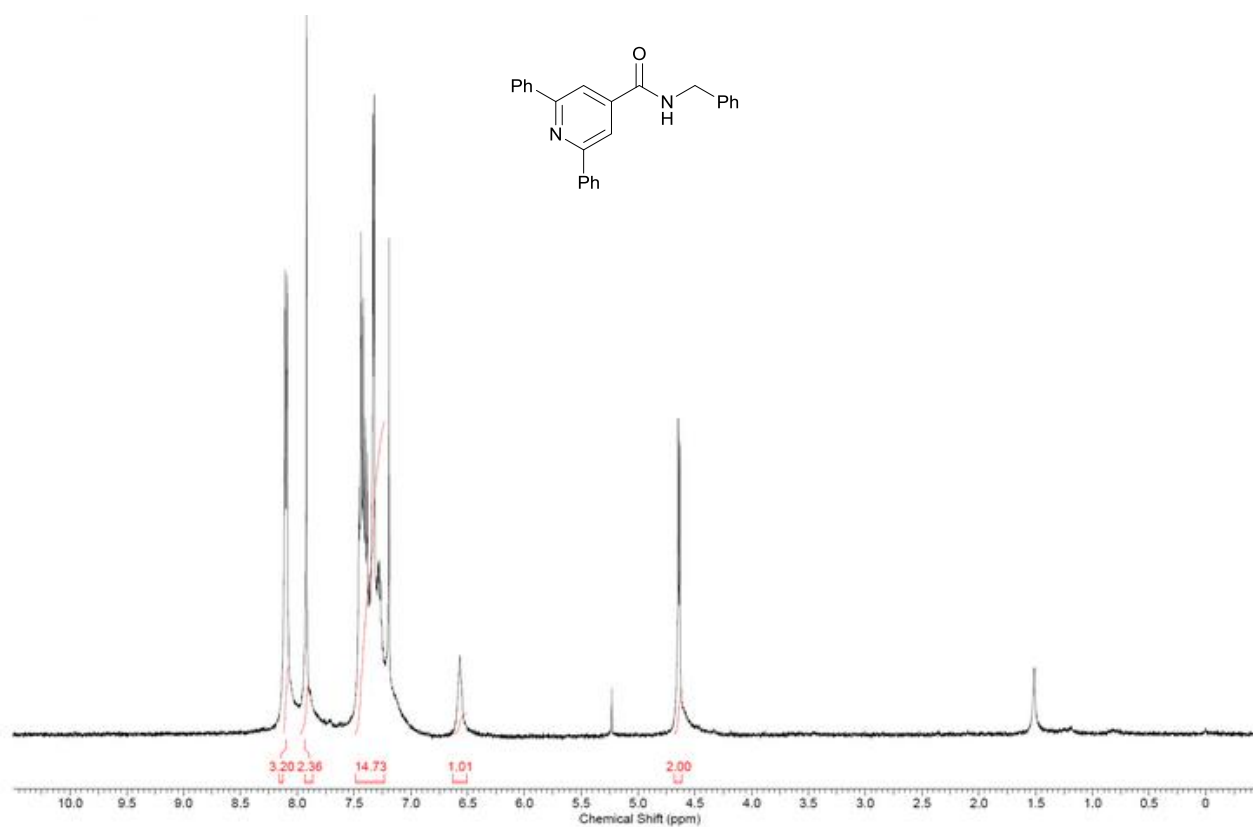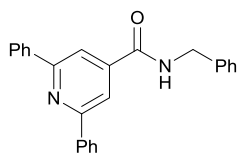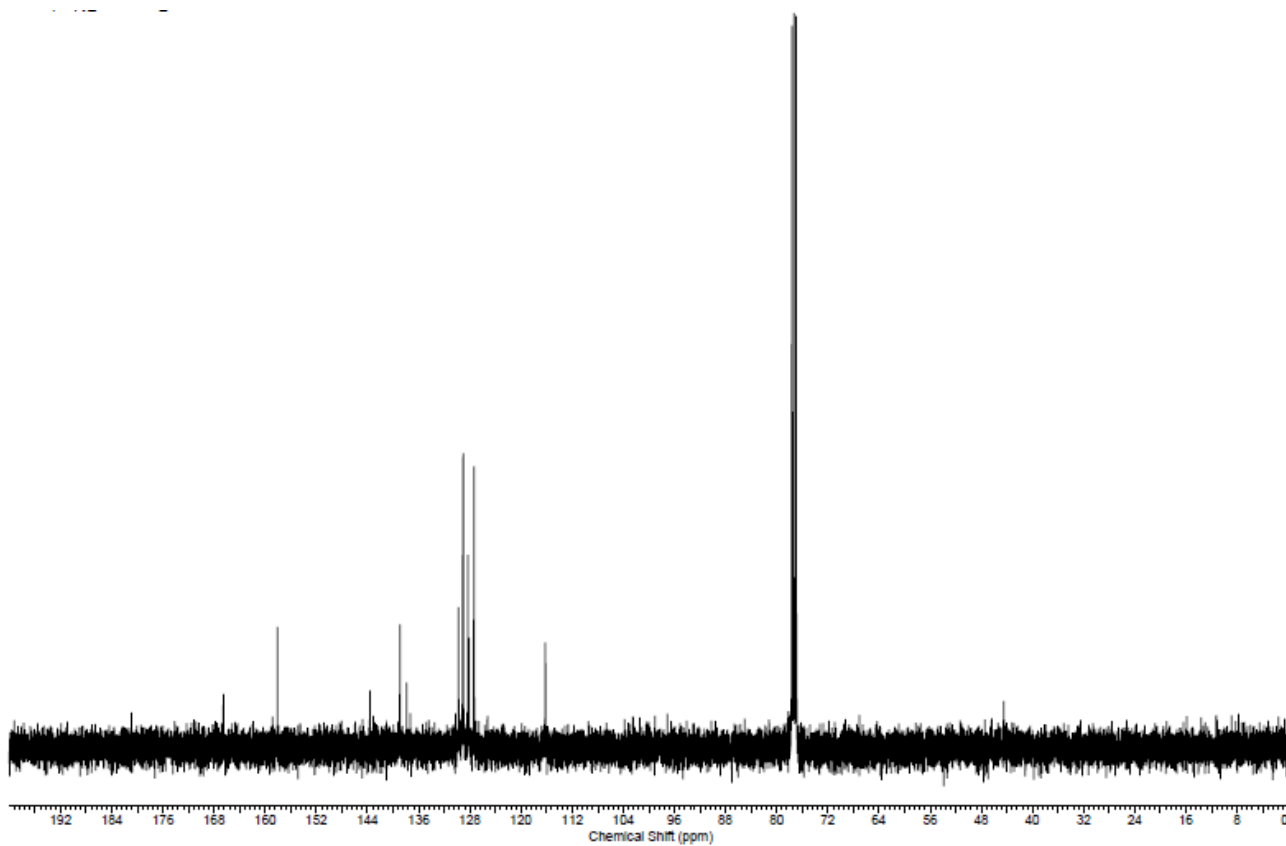

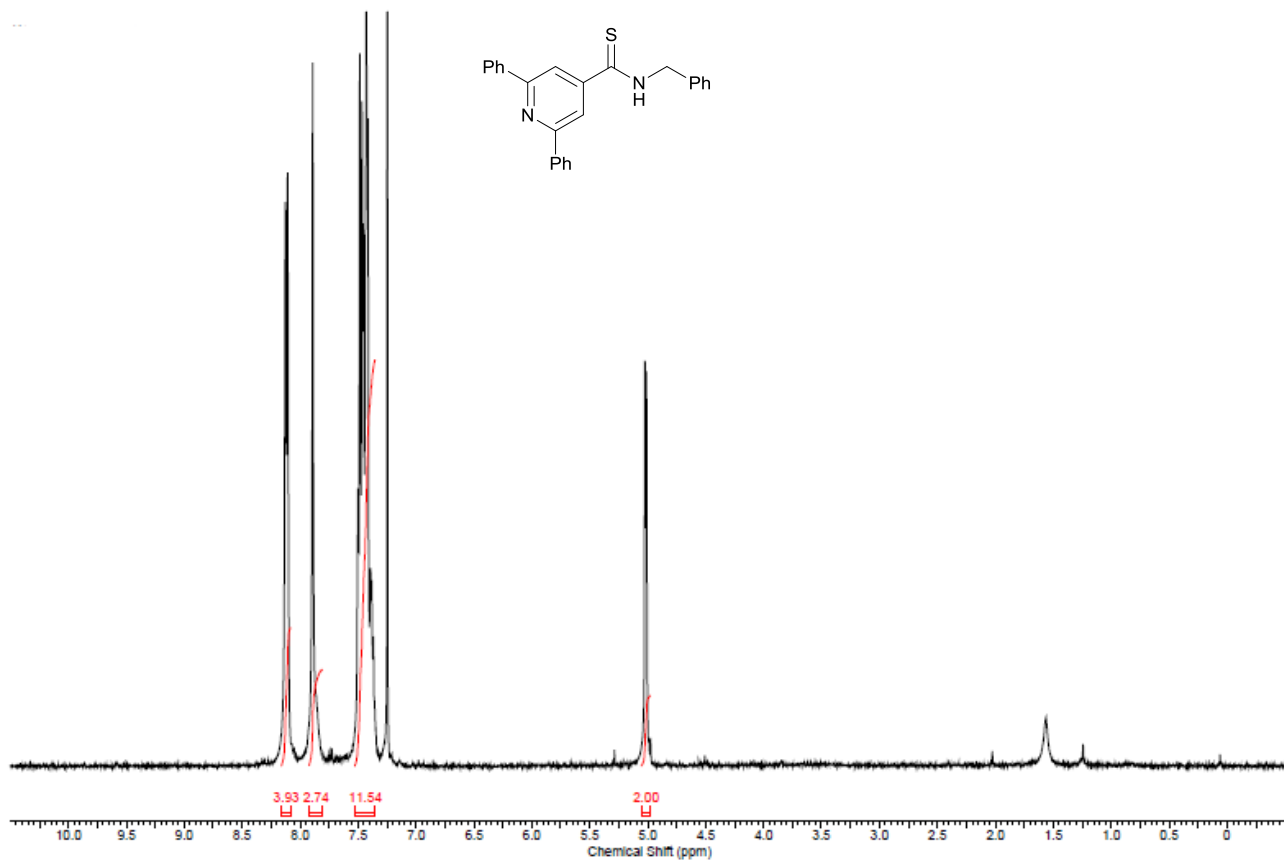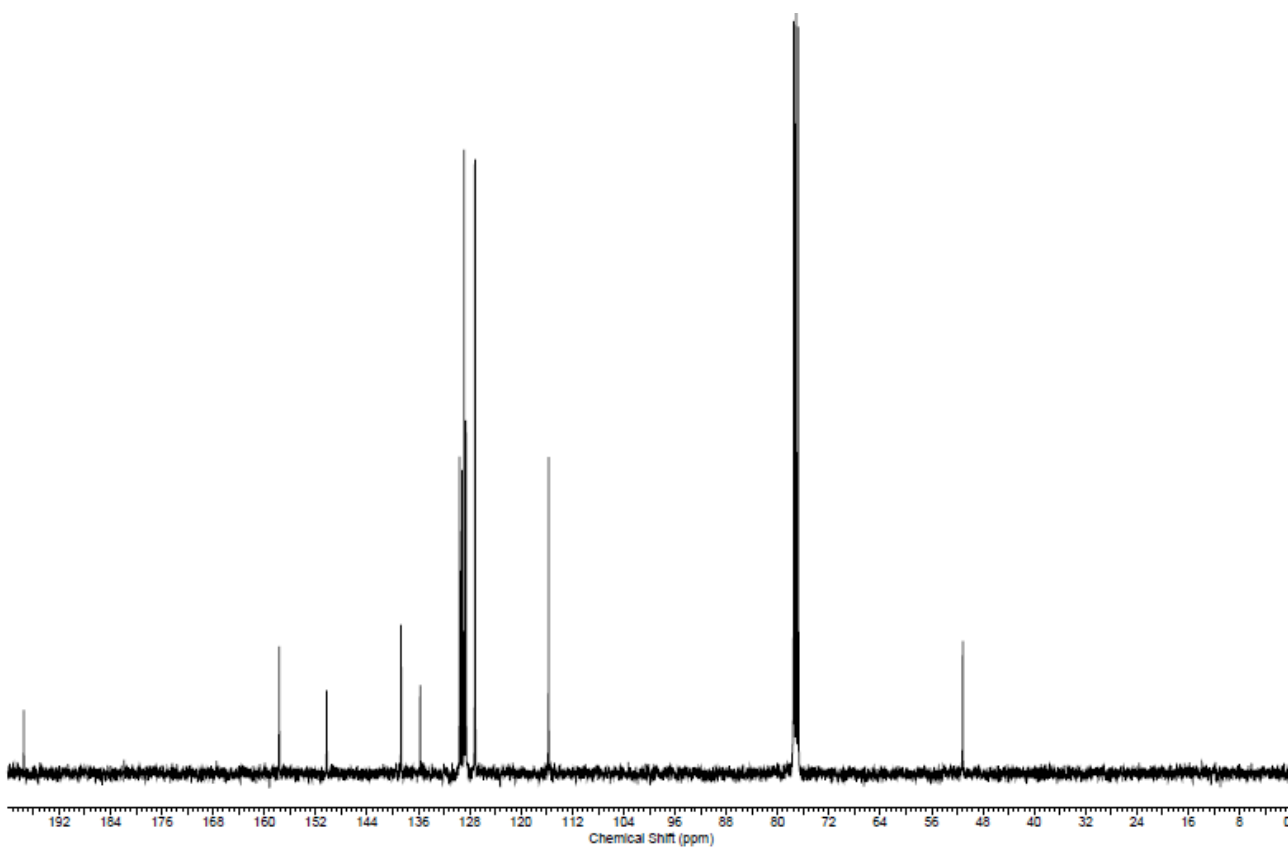

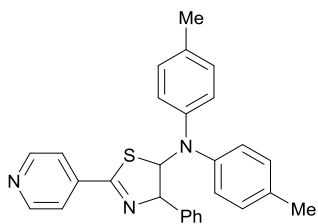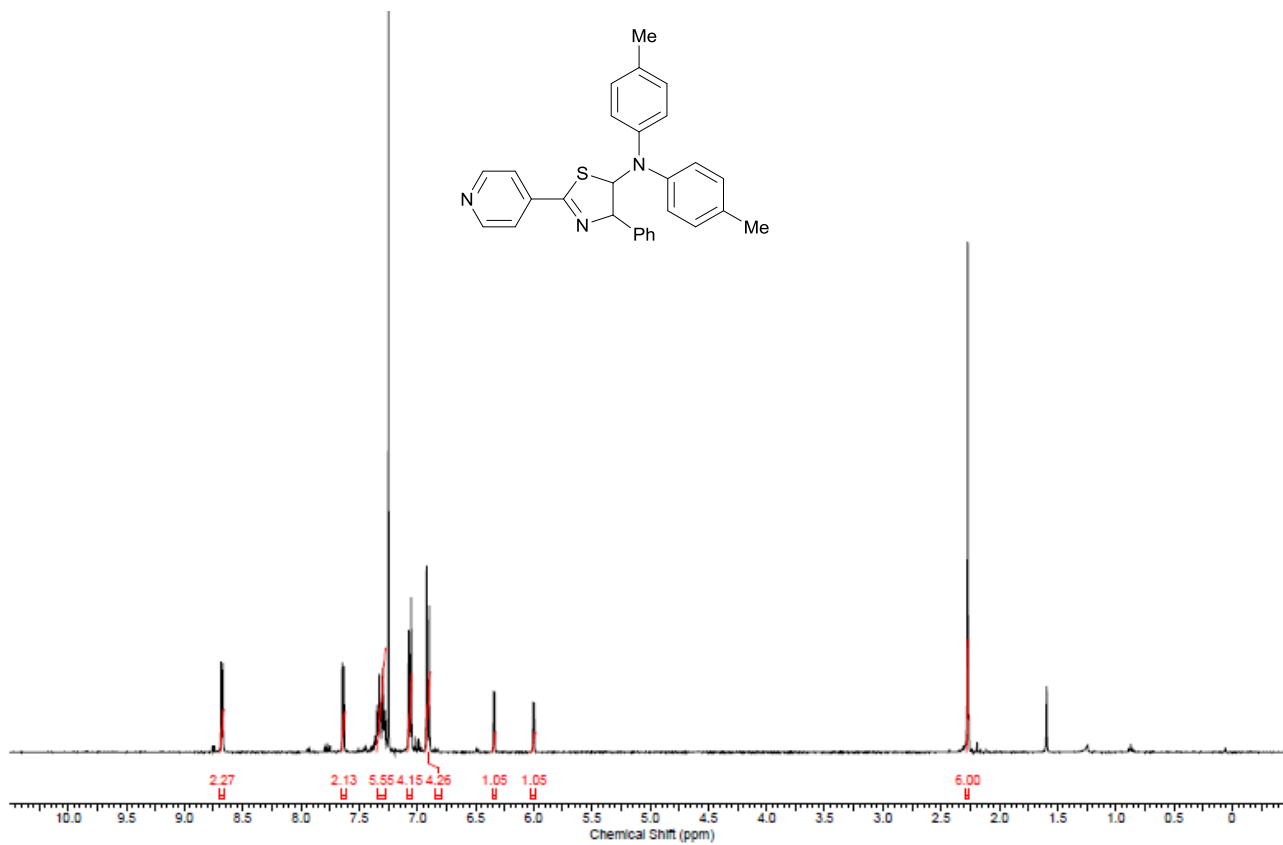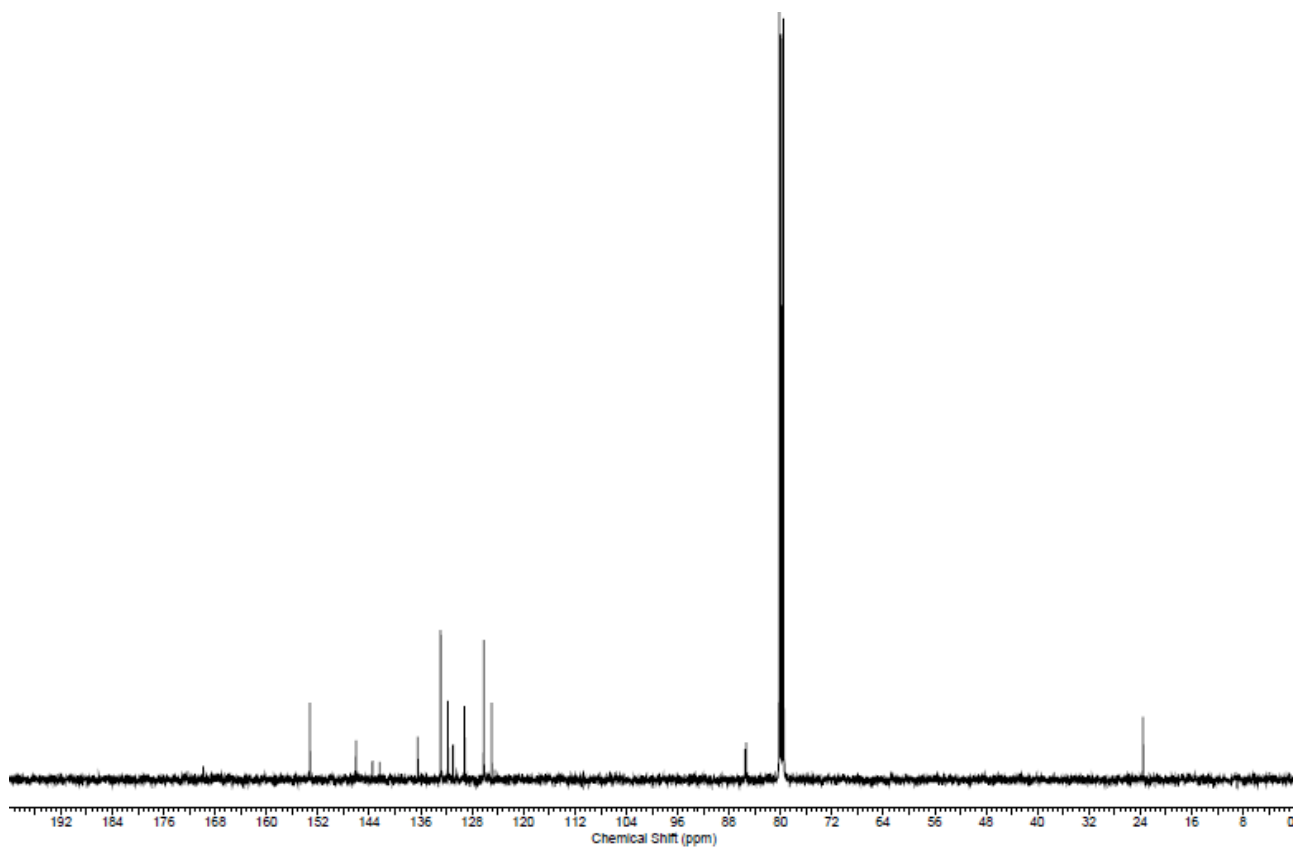



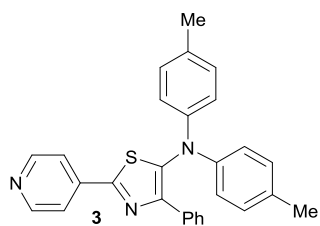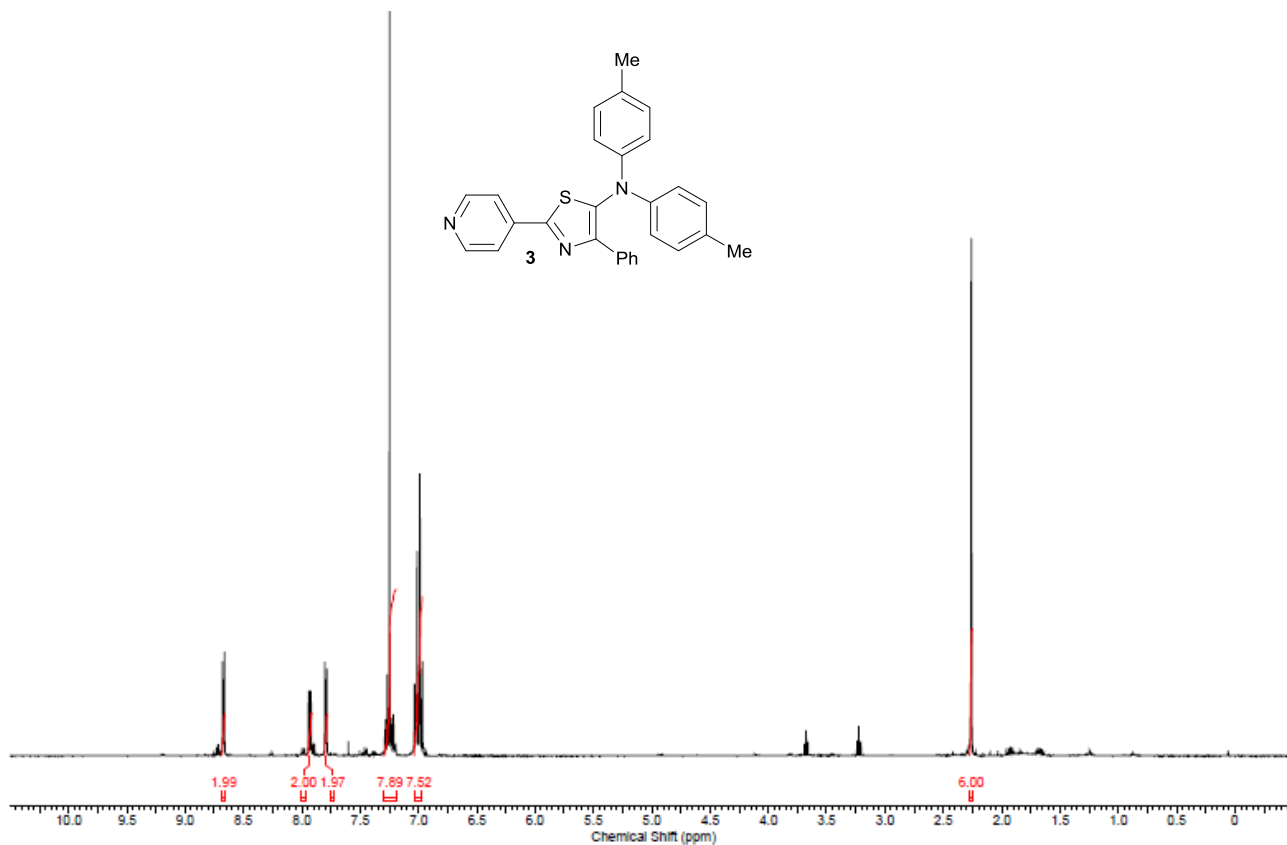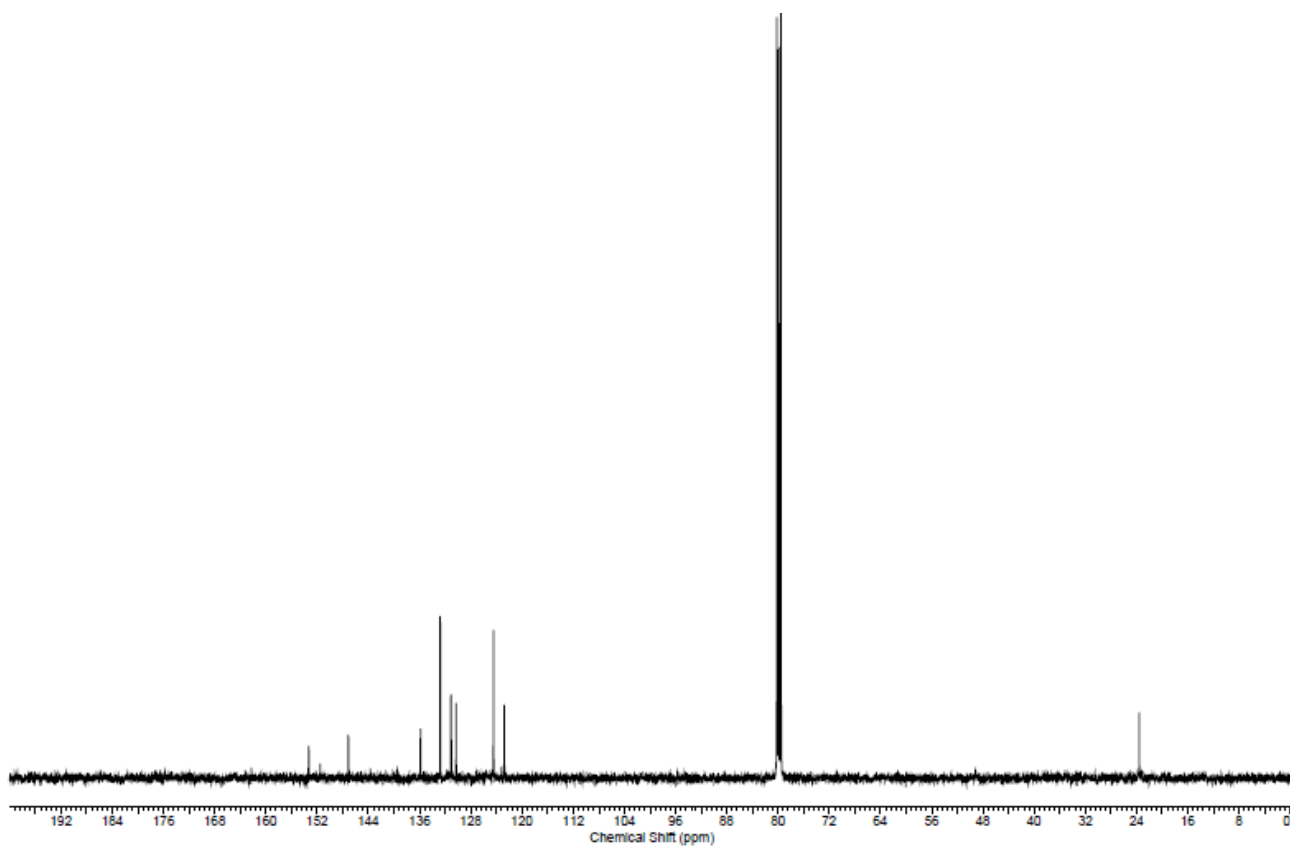

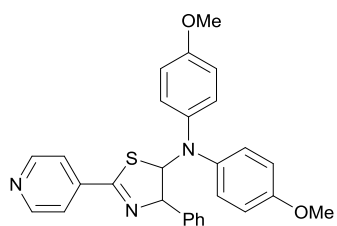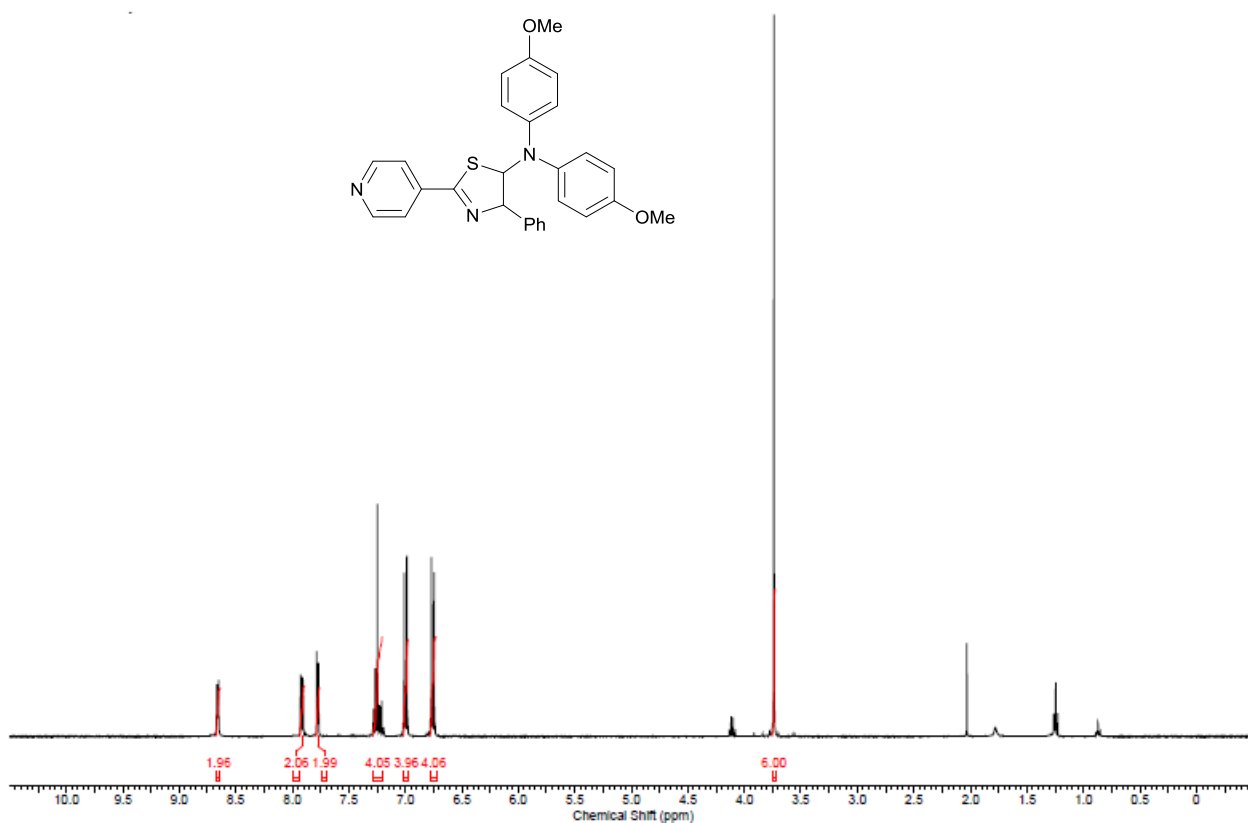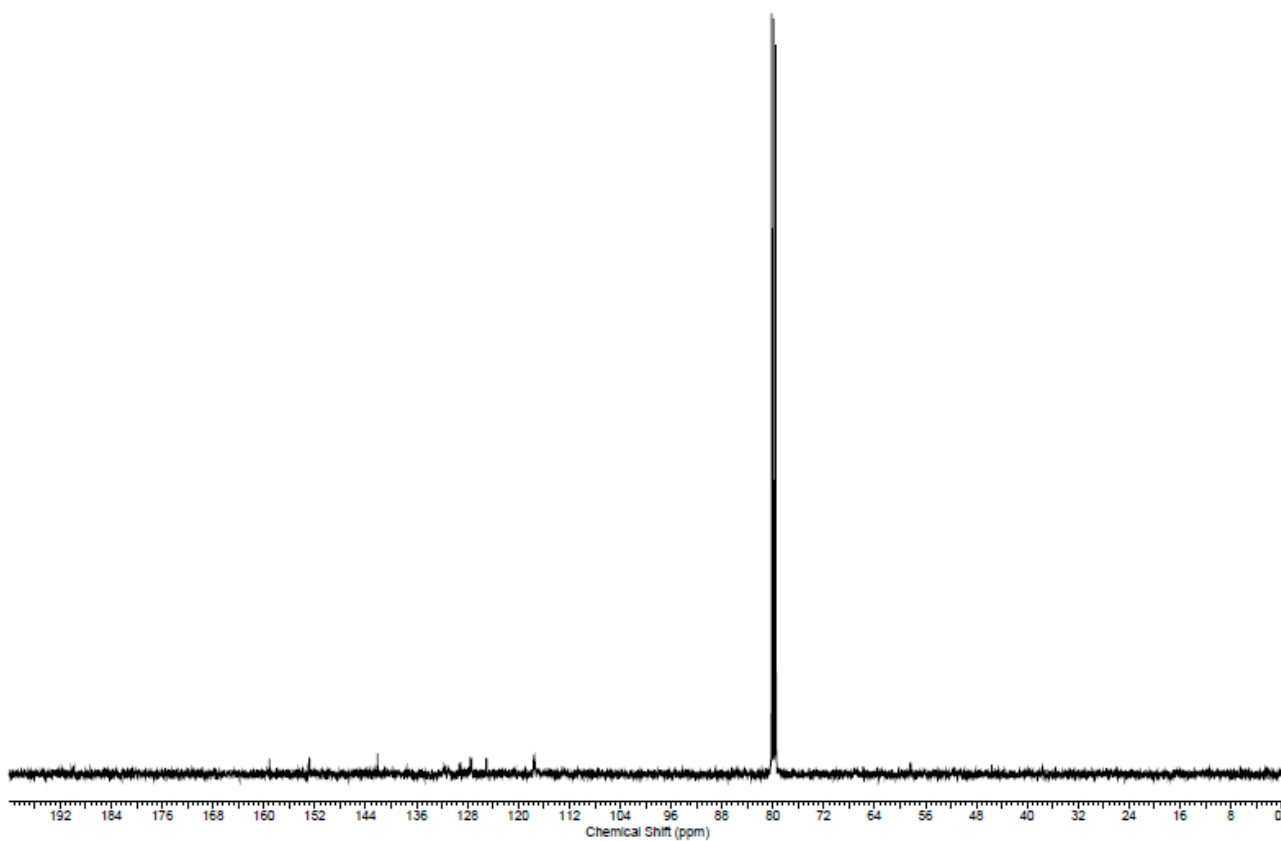

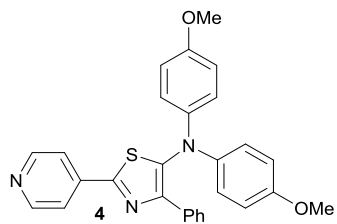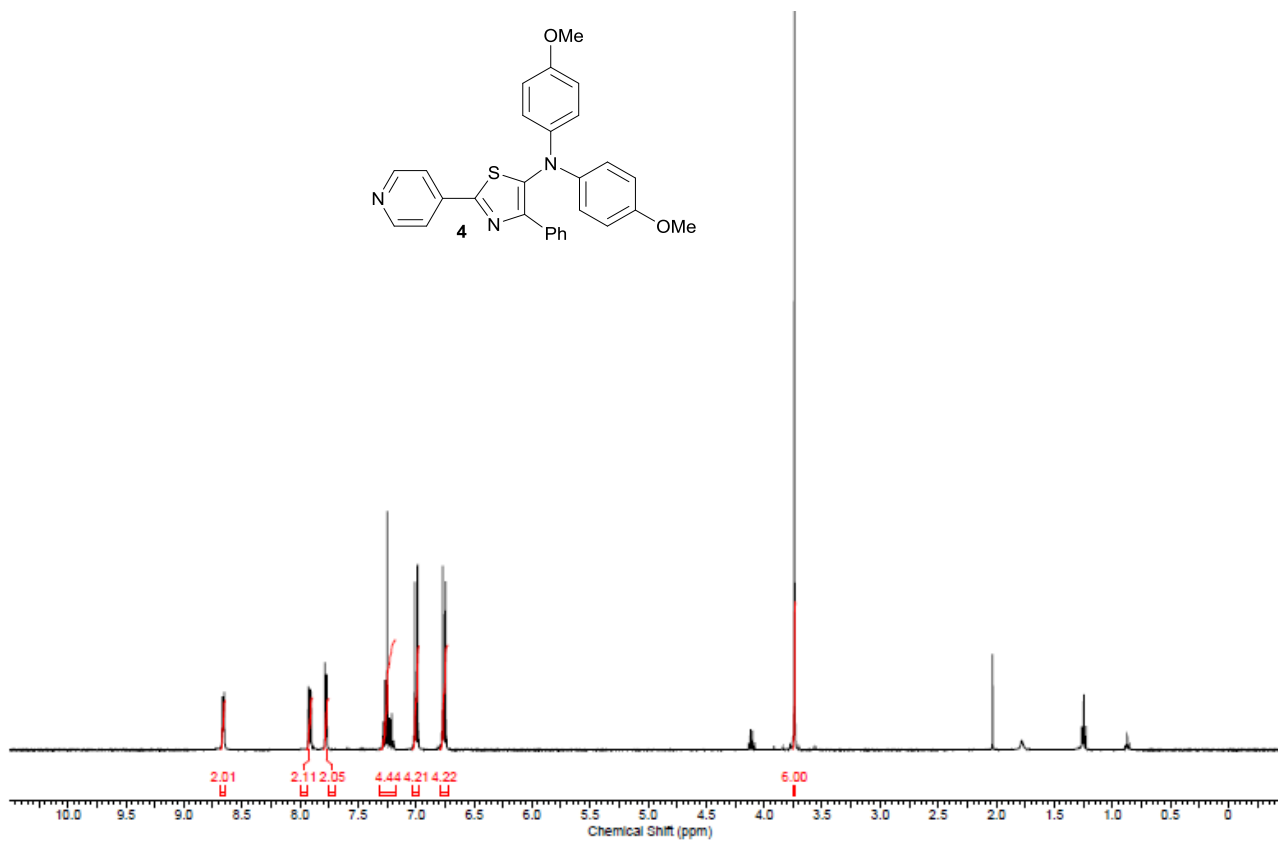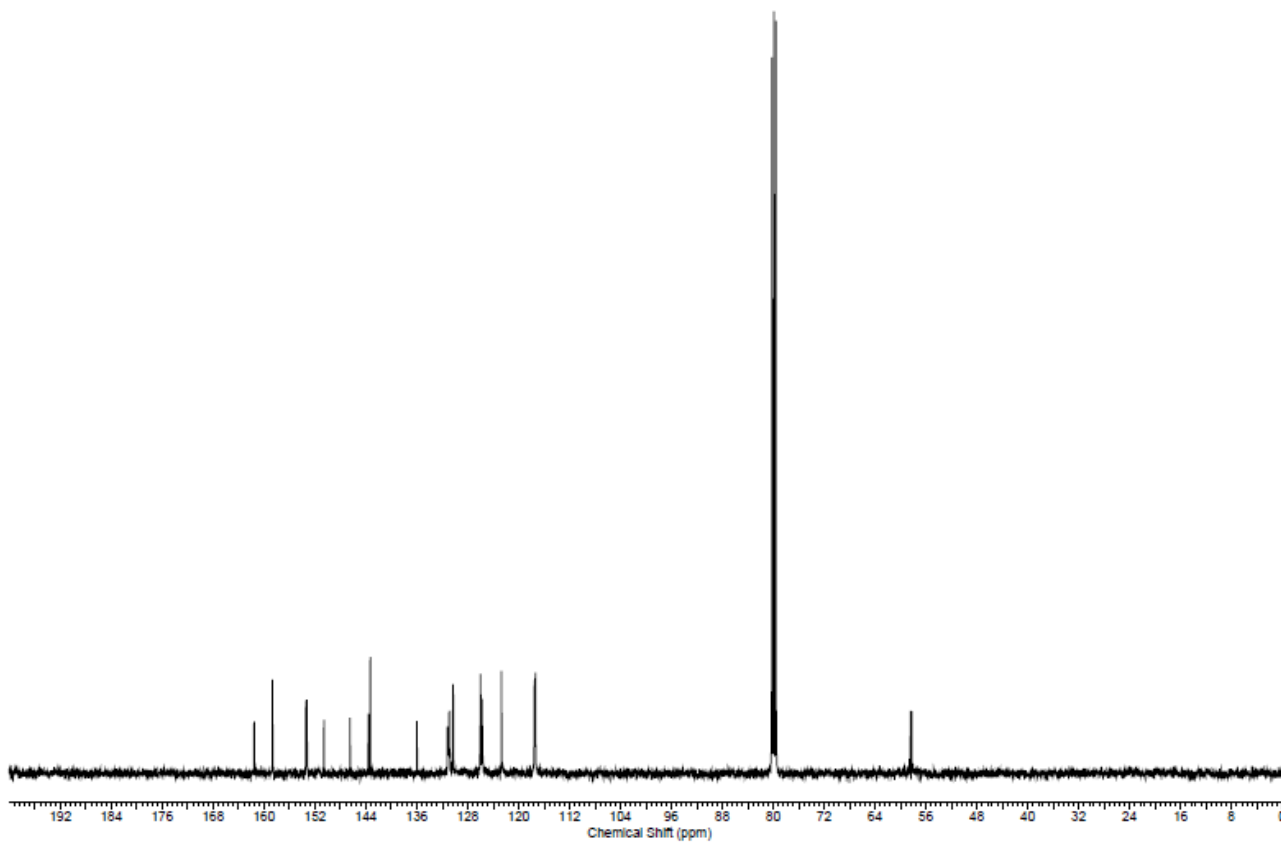

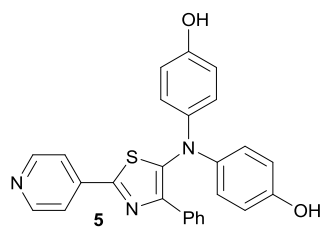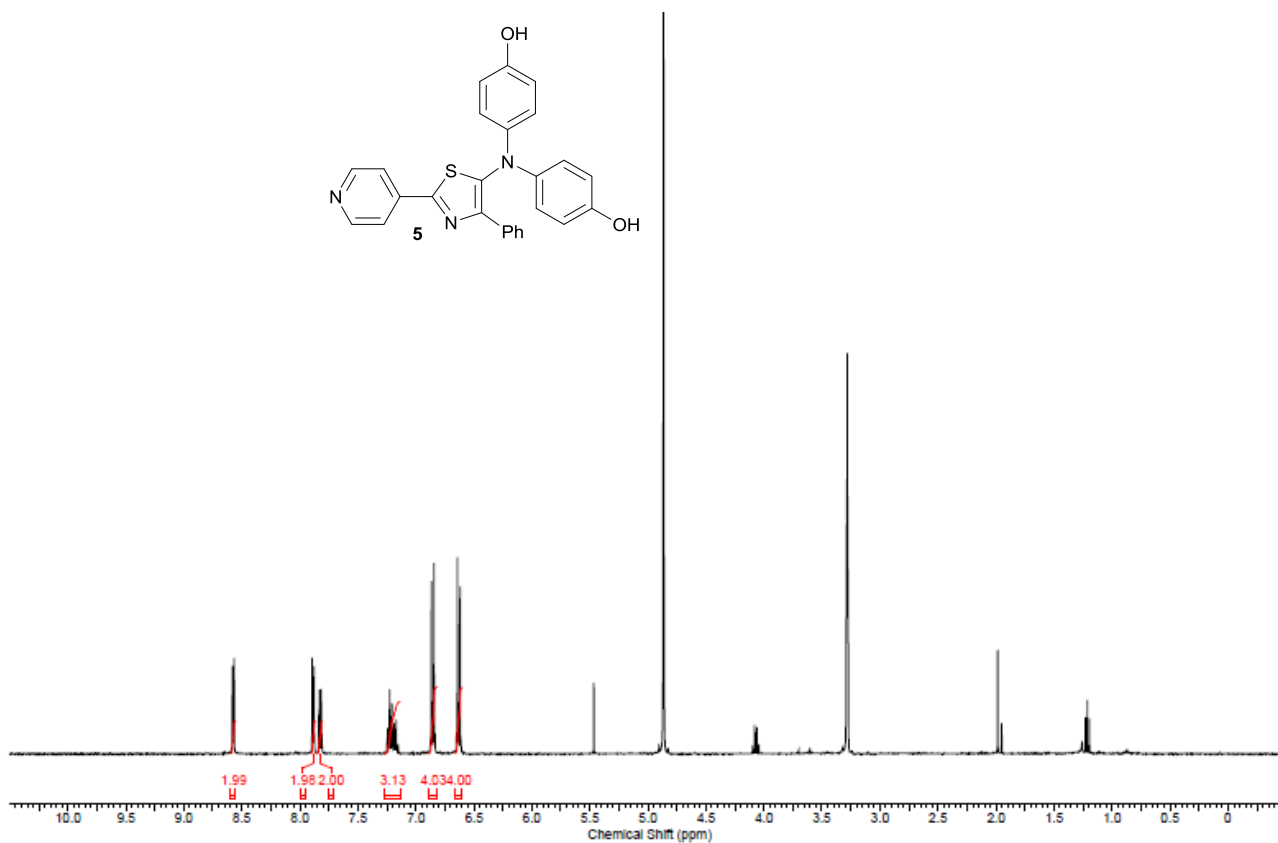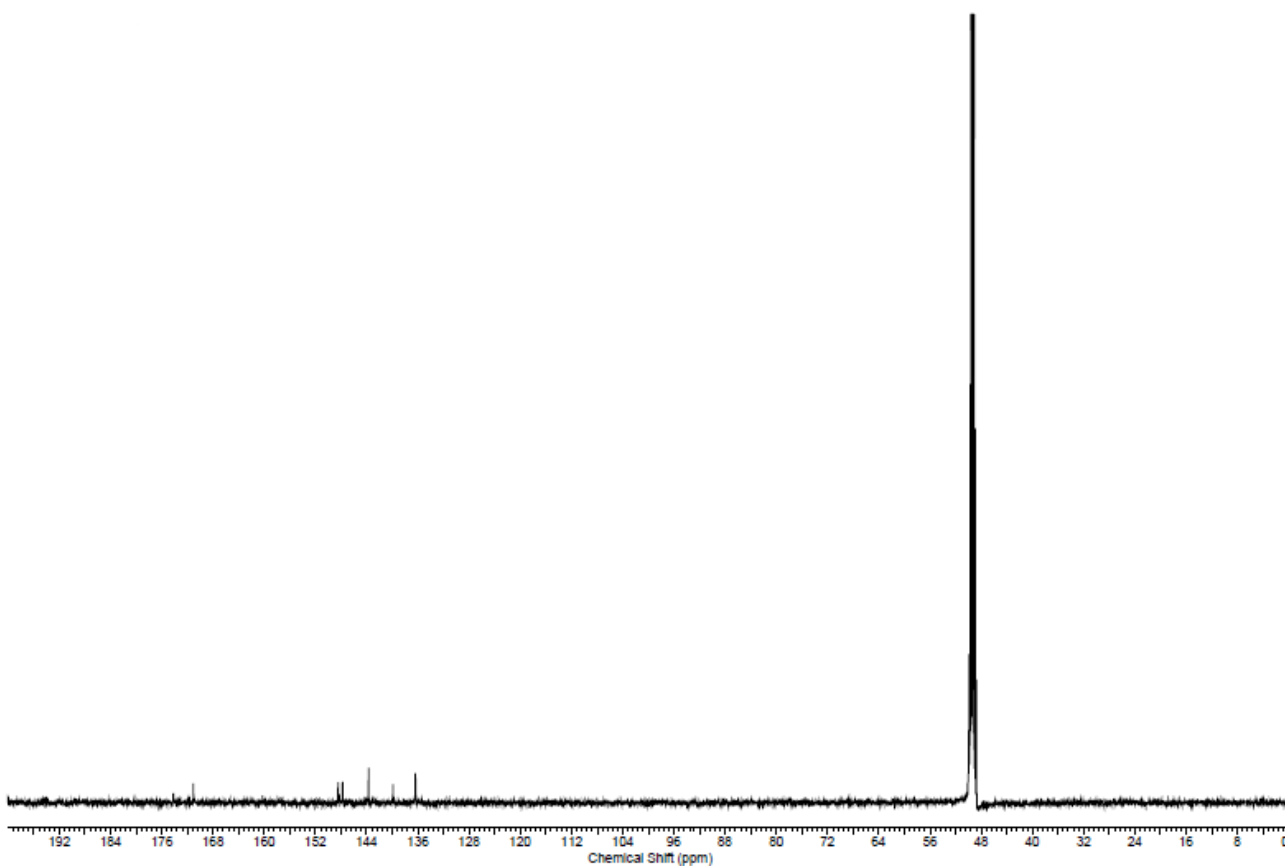

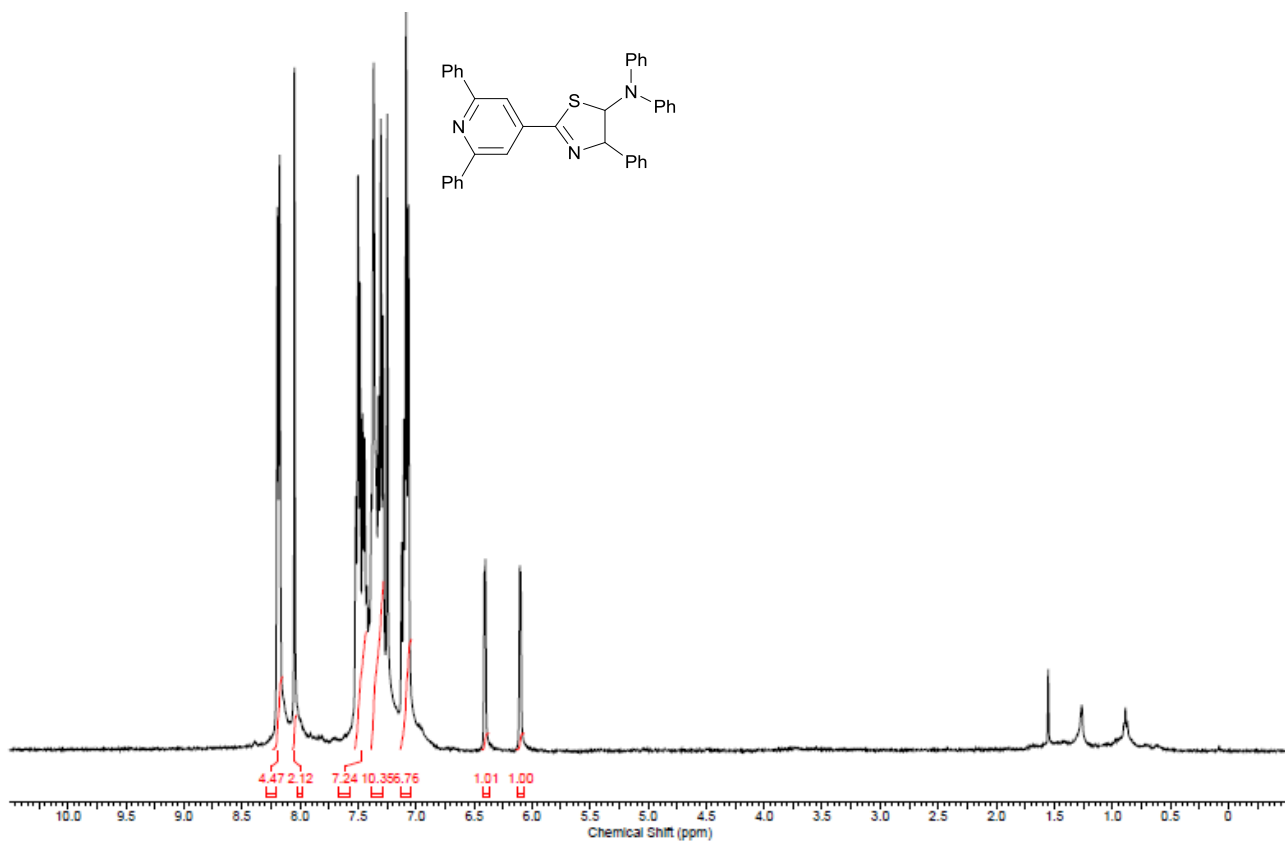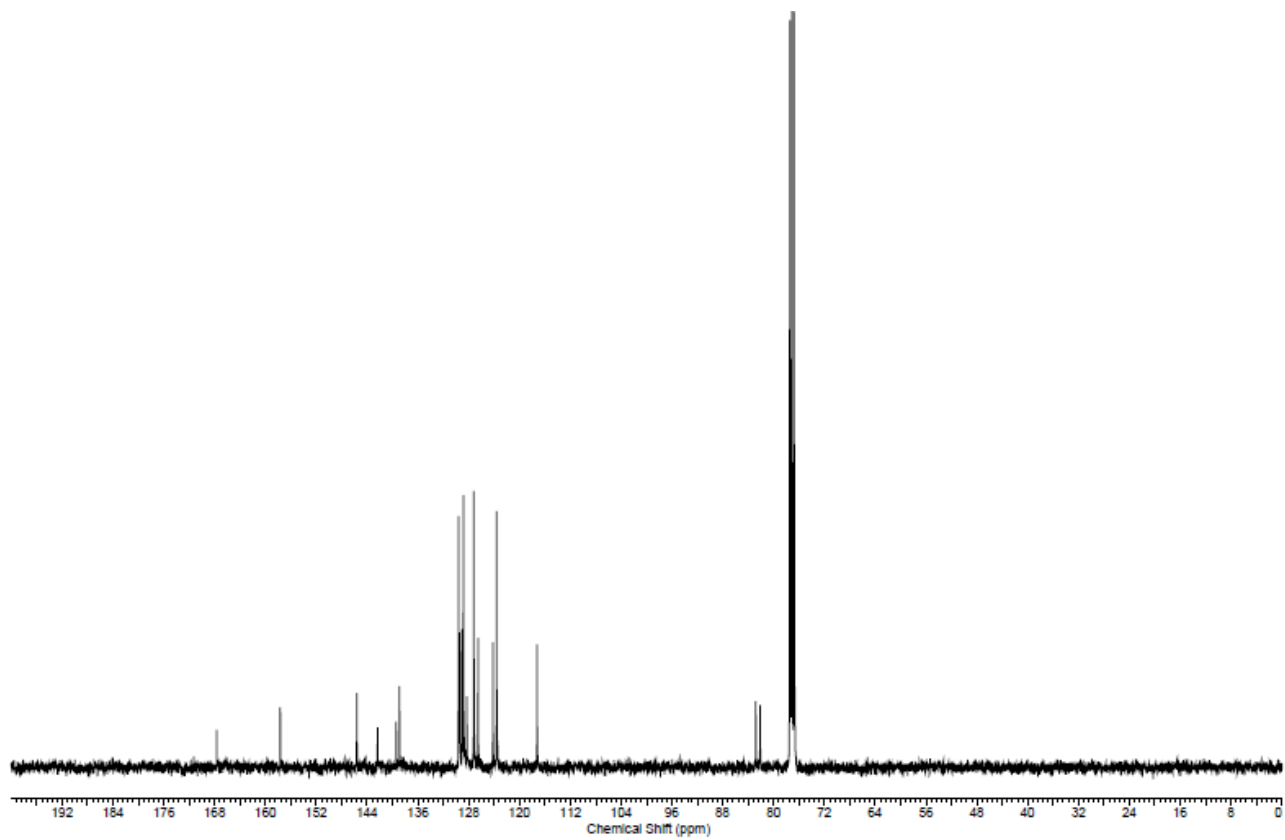

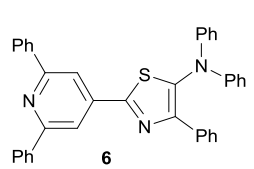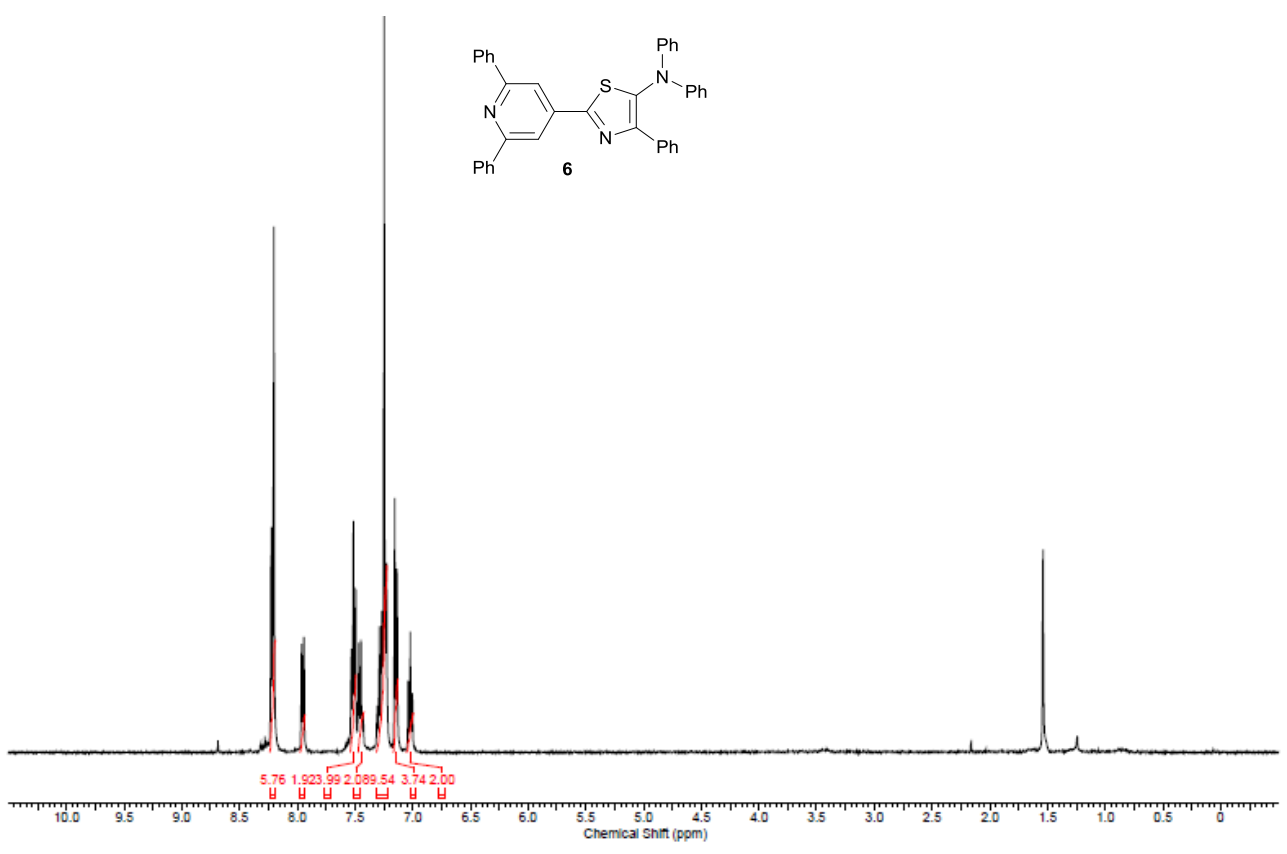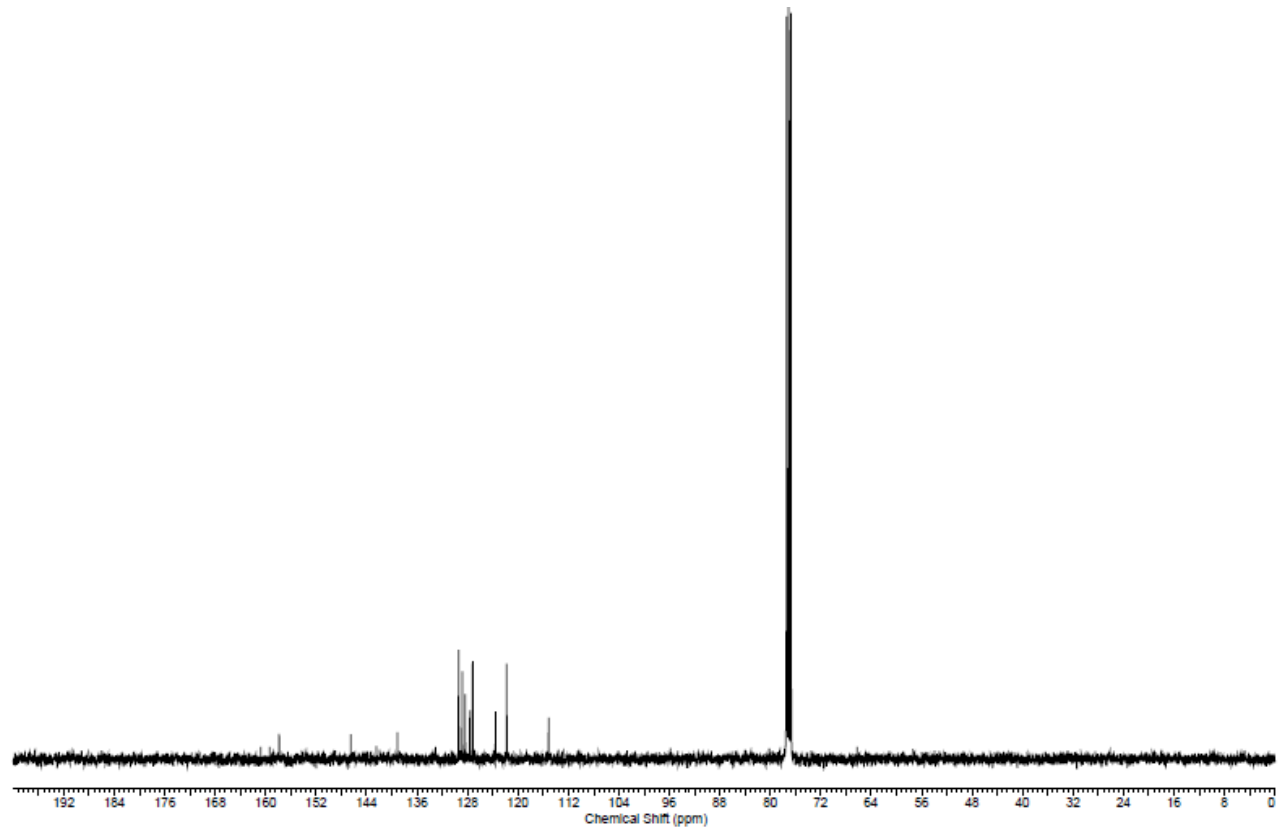

Supplement: OPEN-5-434-s001.pdf [file OPEN-5-434-s001.pdf]
